# Supplementary material for: Activation of the γ-Tubulin Complex by the Mto1/2 Complex
Source: PubMed Central journal article supplement (PMC3989768; doi:10.1016/j.cub.2014.03.006), 2014-04-14
Supplement: mmc7.pdf [file mmc7.pdf]

# Activation of the $\gamma$ -Tubulin Complex by the Mto1/2 Complex

Eric M. Lynch,<sup>1</sup> Lynda M. Grocock,<sup>1,2</sup> Weronika E. Borek,<sup>1</sup> and Kenneth E. Sawin<sup>1,\*</sup>

<sup>1</sup>Wellcome Trust Centre for Cell Biology, School of Biological Sciences, University of Edinburgh, Swann Building, Mayfield Road, Edinburgh EH9 3JR, UK

## Summary

The multisubunit  $\gamma$ -tubulin complex ( $\gamma$ -TuC) is critical for microtubule nucleation in eukaryotic cells [1, 2], but it remains unclear how the  $\gamma$ -TuC becomes active specifically at microtubule-organizing centers (MTOCs) and not more broadly throughout the cytoplasm [3, 4]. In the fission yeast *Schizosaccharomyces pombe*, the proteins Mto1 and Mto2 form the Mto1/2 complex, which interacts with the  $\gamma$ -TuC and recruits it to several different types of cytoplasmic MTOC sites [5–10]. Here, we show that the Mto1/2 complex activates  $\gamma$ -TuC-dependent microtubule nucleation independently of localizing the  $\gamma$ -TuC. This was achieved through the construction of a “minimal” version of Mto1/2, Mto1/2[bonsai], that does not localize to any MTOC sites. By direct imaging of individual Mto1/2[bonsai] complexes nucleating single microtubules in vivo, we further determine the number and stoichiometry of Mto1, Mto2, and  $\gamma$ -TuC subunits Alp4 (GCP2) and Alp6 (GCP3) within active nucleation complexes. These results are consistent with active nucleation complexes containing ~13 copies each of Mto1 and Mto2 per active complex and likely equimolar amounts of  $\gamma$ -tubulin. Additional experiments suggest that Mto1/2 multimers act to multimerize the fission yeast  $\gamma$ -tubulin small complex and that multimerization of Mto2 in particular may underlie assembly of active microtubule nucleation complexes.

## Results and Discussion

Mto1/2 localizes the  $\gamma$ -tubulin complex ( $\gamma$ -TuC) to all cytoplasmic microtubule-organizing centers (MTOCs) throughout the cell cycle [10, 11]. During interphase, Mto1/2 recruits the  $\gamma$ -TuC to the cytoplasmic face of the spindle pole body (SPB), to preexisting microtubules (MTs), and, less abundantly, to the nuclear envelope (NE), leading to MT nucleation from all of these sites. During anaphase elongation of the intranuclear mitotic spindle, Mto1/2 recruits the  $\gamma$ -TuC to the cytoplasmic face of the SPB to support astral MT nucleation, and during late mitosis, Mto1/2 recruits the  $\gamma$ -TuC to an equatorial MTOC (eMTOC) associated with the cytokinetic actomyosin ring, to generate a postanaphase MT array that stabilizes the actomyosin ring [12]. While Mto1/2 can be described as an attachment factor localizing the  $\gamma$ -TuC to different subcellular sites [3], *mto1 $\Delta$*  cells exhibit a complete failure of de novo cytoplasmic MT nucleation [5, 13]. This suggests that Mto1/2

may be involved not only in  $\gamma$ -TuC localization but also somehow in  $\gamma$ -TuC activation. We envisaged two general models by which interaction of Mto1/2 with the  $\gamma$ -TuC could be important for generating active MTOCs. First, Mto1/2 might function only to localize the  $\gamma$ -TuC to prospective MTOC sites, and additional factors would then subsequently activate the  $\gamma$ -TuC at these sites. Alternatively, binding of Mto1/2 to the  $\gamma$ -TuC might simultaneously both localize and activate the  $\gamma$ -TuC [14]. We reasoned that if we could construct a mutant version of Mto1/2 that failed to localize to conventional MTOC sites but nevertheless promoted MT nucleation, this would provide strong support for the second model.

## Free Cytosolic Mto1/2[bonsai] Complexes Promote Spatially Random Microtubule Nucleation In Vivo

Because Mto1 C-terminal regions target the protein to MTs, the SPB, and the eMTOC [10], we first removed these regions by replacing the endogenous *mto1+* gene with GFP-tagged C-terminal truncations (Figure 1A; see also [Supplemental Experimental Procedures](#) available online). The smallest truncation mutant in which Mto1/2 remained functional was *mto1(1-549)-GFP* (Figure S1A). Unlike full-length Mto1-GFP, Mto1(1-549)-GFP localized almost exclusively to the NE, in the form of discrete puncta, and in these cells the  $\gamma$ -TuC protein Alp4 (GCP2 homolog) similarly localized to the NE (Figure S1B). We will therefore refer to Mto1(1-549) as “Mto1[NE].” In live-cell imaging experiments, both *mto1[NE]-GFP* and untagged *mto1[NE]* cells showed greater than 2-fold increased MT nucleation from the nuclear surface relative to wild-type cells (Figures 1F, S1E, and S1G; [Movie S1](#)), and Mto2-GFP in *mto1[NE]* cells also localized to the NE (Figure S1C). Interestingly, after drug- or cold-induced MT depolymerization, full-length Mto1 also redistributes to the NE ([13, 15]; see also [Figures 1C and S2A](#)). This suggests that normal steady-state localization of Mto1/2 may depend on a dynamic partitioning mechanism in which multiple prospective MTOC sites compete for a limited pool of Mto1/2 (Figure 1B). According to this view, in unperturbed wild-type cells, high-affinity/abundance sites such as MTs or the SPB largely outcompete the NE for recruitment of wild-type Mto1/2, but when MTs are absent (as in the case of full-length Mto1) or Mto1/2 cannot bind to such sites (as in the case of Mto1[NE]), competition is abolished, leading to increased Mto1/2 localization to the NE. Supporting this view of localization depending on competition, we found that both Mto1 and Mto2 are low-abundance proteins, each present at 1,200–1,400 molecules per cell (Figure S1D).

Truncation of the N terminus of full-length Mto1 (*mto1[N $\Delta$ 130]*; Figure 1A) abrogated the redistribution to the NE that occurs upon MT depolymerization, both under conditions of normal expression and mild overexpression (Figures 1C and S2A). Consistent with this, MT regrowth after cold-induced depolymerization occurred randomly throughout the cytoplasm in *mto1[N $\Delta$ 130]-GFP* cells, unlike wild-type cells, in which regrowth occurs mainly from the NE (Figures 1D and S2B; [15]). In live-cell imaging experiments, *mto1[N $\Delta$ 130]-GFP* cells also showed strongly decreased MT nucleation in the vicinity of the NE compared to *mto1-GFP* cells (Figures 1F, S1F, and S1G).

<sup>2</sup>Present address: The Scripps Research Institute, North Torrey Pines Road, La Jolla, CA 92037, USA

\*Correspondence: [ken.sawin@ed.ac.uk](mailto:ken.sawin@ed.ac.uk)

This is an open access article under the CC BY license (<http://creativecommons.org/licenses/by/3.0/>).

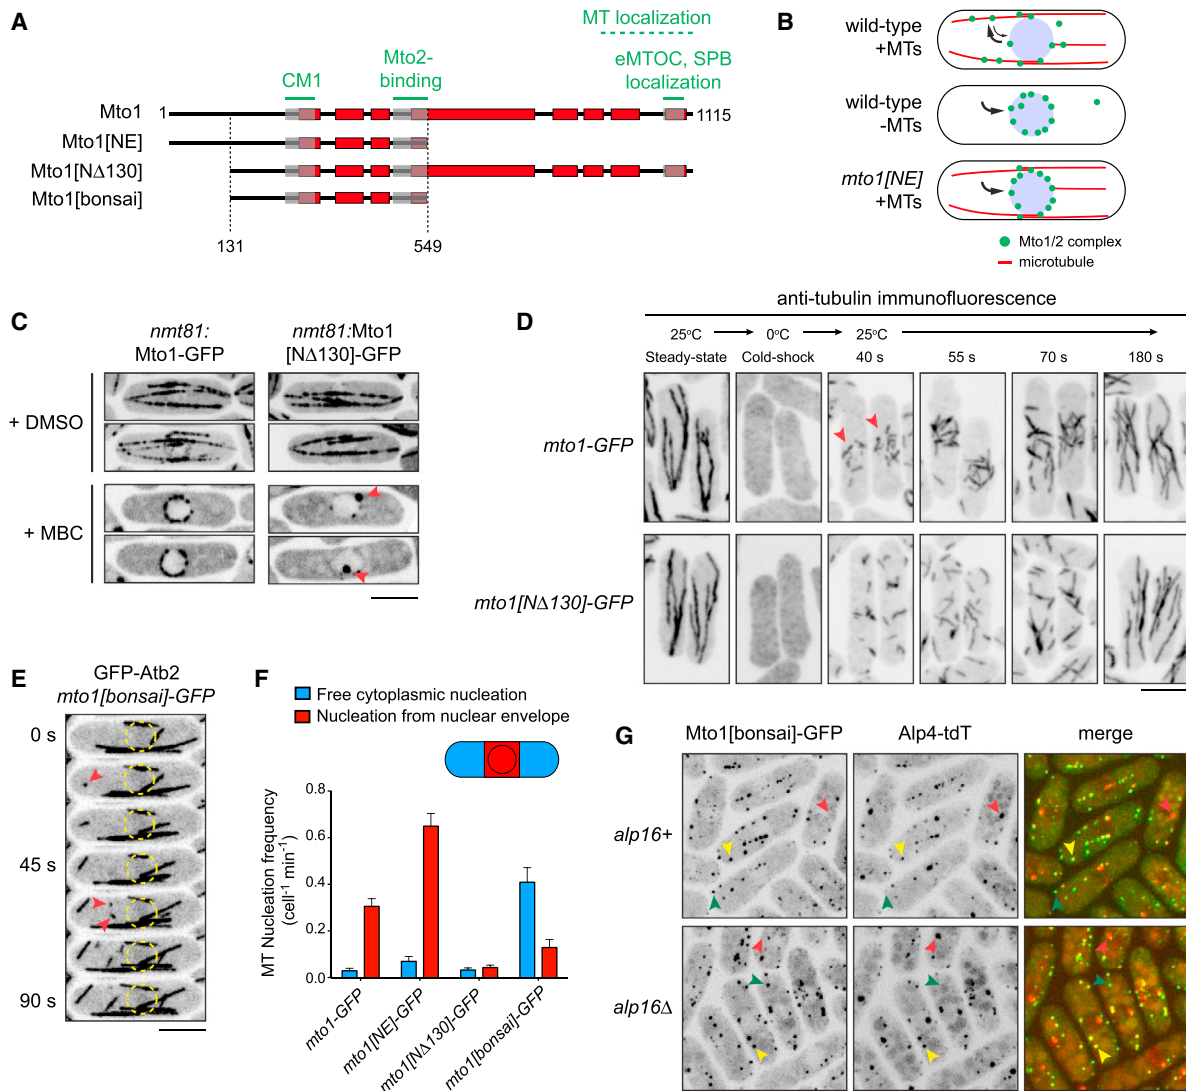

**Figure 1. Mto1[bonsai], a “Minimal” Mto1 Truncation Mutant, Promotes Spatially Random Cytoplasmic Microtubule Nucleation**

(A) Schematic of full-length Mto1 and Mto1 truncation mutants. Dashed lines indicate N- and C-terminal truncation sites. Red boxes indicate predicted coiled coils. Gray boxes indicate regions involved in binding to  $\gamma$ -TuC (centrosomin motif 1; CM1), binding to Mto2, and localization to the equatorial microtubule-organizing center and spindle pole body (eMTOC and SPB). The region involved in binding to microtubules (MTs) is approximately defined [10]. (B) Cartoon summarizing the different means by which Mto1/2 complexes can become enriched on the nuclear envelope. (C) Localization of mildly overexpressed Mto1-GFP and Mto1[NΔ130]-GFP in control cells (+DMSO) and after MT depolymerization by methyl benzimidazol-2-yl-carbamate (MBC). Arrows indicate Mto1[NΔ130]-GFP at spindle pole bodies, but not more generally on the nuclear envelope (NE). (D) Anti-tubulin immunofluorescence showing time course and spatial distribution of MT regrowth after cold-induced MT depolymerization in *mto1*-GFP and *mto1*[NΔ130]-GFP cells. Arrows indicate regrowth from NE. (E) Time-lapse images (15 s interval) of GFP-tubulin in an *mto1*[bonsai]-GFP cell. Arrows indicate de novo MT nucleation events free in the cytoplasm. Circles indicate position of nucleus. Relative to GFP-tubulin, Mto1[bonsai]-GFP is too faint to be seen. See [Movie S1](#) for corresponding movie. (F) Frequency of de novo MT nucleation ( $\pm$ SEM) free in the cytoplasm versus in the NE region in the cell genotypes indicated (see also [Movie S1](#)). The apparent low total MT nucleation frequency in *mto1*-GFP and *mto1*[NΔ130]-GFP cells is artifactual; in these cells, a significant proportion of nucleation occurs on preexisting MTs but cannot be quantified and thus is excluded from analysis (see [Supplemental Experimental Procedures](#)). (G) Localization of Mto1[bonsai]-GFP in wild-type (*alp16*<sup>+</sup>) and in *alp16*<sup>Δ</sup> cells, together with  $\gamma$ -TuC protein Alp4 (GCP2 homolog) fused to tandem-dimer Tomato (Alp4-tdT). Green arrows indicate Mto1[bonsai] puncta without Alp4. Yellow arrows indicate Mto1[bonsai] puncta with Alp4. Red arrows indicate spindle pole bodies (nucleoplasmic face), which contain Alp4 but not Mto1[bonsai]. Scale bars, 5  $\mu$ m.

Based on these results, we truncated *mto1* simultaneously at both N and C termini to make *mto1*[131-549]-GFP. Because this was found to be the smallest Mto1 fragment that supports MT nucleation in vivo (see below and [Supplemental Experimental Procedures](#)), we will refer to Mto1[131-549] as “Mto1[bonsai],” by analogy to other miniaturized but functional proteins [16, 17]. Strikingly, in live-cell imaging, *mto1*[bonsai]-GFP

cells nucleated cytoplasmic MTs in a spatially random manner, with the majority of nucleation events occurring freely in the cytoplasm (Figures 1E, 1F, S1F, and S1G; [Movie S1](#)). Similar results were obtained in MT-regrowth experiments (Figure S2B). Interestingly, many freely nucleated microtubules quickly aligned and bundled with other MTs ([Movies S1, S2, and S4](#)). This led to steady-state distributions in which most

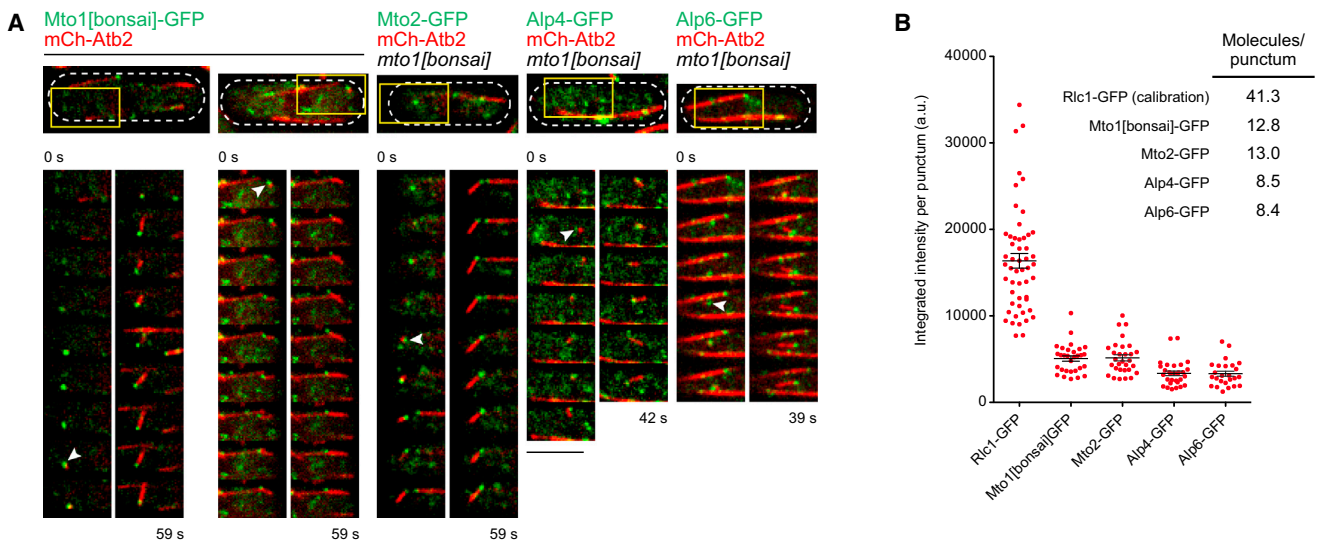

**Figure 2. Direct Observation of Single Microtubule Nucleation by Mto1[bonsai] Puncta Reveals Protein Copy Number within Individual Puncta**  
(A) Time-lapse images (3.3 s interval) of mCherry-microtubule nucleation (mCh-Atb2) from Mto1[bonsai]-GFP puncta as well as from Mto2-GFP, Alp4-GFP, and Alp6-GFP puncta in an untagged *mto1[bonsai]* background. Panels show single z sections or maximum projections of two adjacent z sections. Upper panels show entire cell area. Lower panels correspond to regions indicated by yellow boxes and show time-lapse images of nucleating puncta (white arrows). See [Movie S2](#) for corresponding movies.  
(B) Fluorescent signal of individual Mto1[bonsai]-GFP, Mto2-GFP, Alp4-GFP, and Alp6-GFP puncta ( $\pm$ SEM), quantified at the time of microtubule nucleation. Calculation of molecules per punctum used Rlc1-GFP cytokinesis nodes as a fluorescence calibration standard [19]. Scale bar, 5  $\mu$ m.

MTs were oriented along the long axis of the cell in spite of spatially random nucleation (see for example [Figures 3B](#) and [S2B–S2D](#)).

Mto1[bonsai]-GFP itself was present throughout the cytoplasm as discrete, mobile puncta that did not localize to any conventional MTOC site ([Figures 1G](#), [3A](#), [S2C](#), and [S2D](#); [Movie S2](#)). Most puncta also contained Alp4, although the relative signals of Mto1[bonsai] and Alp4 varied among puncta ([Figure 1G](#)). In many cells, multiple Mto1[bonsai]-GFP puncta appeared to be aligned, coincident with MT bundles ([Figures 1G](#), [S2C](#), and [S2D](#)), which suggested a possible association of Mto1[bonsai] with the MT lattice. However, in contrast to full-length Mto1-GFP, which does bind to the MT lattice [9, 10], three lines of evidence showed that Mto1[bonsai]-GFP localization to MT bundles is due not to lattice binding but rather to the presence of Mto1[bonsai]-GFP at minus ends of MTs that become bundled with other microtubules after nucleation (schematized in [Figure S2E](#)): First, while overexpressed full-length Mto1-GFP decorates MTs along their entire length [9, 10], overexpressed Mto1[bonsai]-GFP did not, remaining instead as discrete puncta ([Figure S2C](#)). A second piece of evidence came from introducing a nine-alanine (9A1) substitution mutation into the  $\sim$ 60-amino-acid centrosomin motif 1 (CM1) region of *mto1* in *mto1[bonsai]-GFP* cells. The 9A1 mutation disrupts interaction with  $\gamma$ -TuC and abolishes Mto1-dependent MT nucleation *in vivo*, but it does not impair association of (full-length) Mto1[9A1]-GFP with the few cytoplasmic MTs that can appear in these cells via “escape” from the intranuclear mitotic spindle at the end of mitosis [13, 15, 18] ([Figure S2D](#)). Unlike Mto1[9A1]-GFP, Mto1[9A1-bonsai]-GFP puncta showed negligible localization to the few cytoplasmic MTs present in the cells ([Figure S2D](#)) and instead diffused freely throughout the cytoplasm ([Movie S3](#)). Therefore, the presence of Mto1[bonsai]-GFP in MT bundles depends on its ability to promote MT nucleation. Third, through live-cell imaging of Mto1[bonsai]-GFP together

with mCherry-tubulin we were able to observe individual Mto1[bonsai]-GFP puncta nucleating single MTs (see below). In addition to demonstrating that Mto1[bonsai]-GFP is directly involved in nucleation, this explicitly showed Mto1[bonsai]-GFP puncta remaining bound to the minus ends of newly nucleated MTs during and after MT bundling ([Figure 2A](#); [Movie S2](#)).

In live-cell imaging of *mto1[bonsai]-GFP* cells expressing mCherry-tubulin, all cytoplasmic MT nucleation events occurred from free Mto1[bonsai]-GFP puncta (30 puncta-associated events out of 30 total events). We also tagged Mto2, Alp4, and Alp6 (GCP3 homolog) with GFP in strains expressing untagged Mto1[bonsai], and in essentially all cases MT nucleation occurred from free puncta containing the GFP-tagged proteins (30 puncta-associated events out of 30 total events for Mto2-GFP, 30/32 for Alp4-GFP, and 25/26 for Alp6-GFP; see also [Figure 2A](#); [Movie S2](#)). Immunoprecipitation experiments showed that Mto1[bonsai]-GFP physically interacts with the  $\gamma$ -TuC, and, as with Mto1-GFP, this requires both an intact Mto1 CM1 region and the presence of Mto2 ([Figures S2F](#) and [S2G](#); [9, 13]). Taken together, our experiments with Mto1[bonsai] indicate that Mto1/2 can promote MT nucleation by the  $\gamma$ -TuC independently of localizing the  $\gamma$ -TuC to any conventional MTOC site—that is, localization and activation of the  $\gamma$ -TuC by Mto1/2 are separable, distinct activities.

#### Microtubule Nucleation by Mto1/2[bonsai] Does Not Require $\gamma$ -TuRC-Specific Proteins

In higher eukaryotes, the  $\gamma$ -TuC exists primarily as the  $\gamma$ -tubulin ring complex ( $\gamma$ -TuRC), which contains several copies of a heterotetrameric subcomplex ( $\gamma$ -tubulin small complex,  $\gamma$ -TuSC) arranged in a lock-washer-like structure [2–4, 20–22]. The  $\gamma$ -TuSC itself contains two copies of  $\gamma$ -tubulin and one copy each of GCP2 and GCP3, which are paralogs and highly conserved among eukaryotes [23, 24] (in fission yeast, Alp4 and Alp6, respectively). Assembly of



$\gamma$ -TuRC from multiple  $\gamma$ -TuSCs depends on additional “ $\gamma$ -TuRC-specific proteins” GCP4, GCP5, and GCP6, which are all predicted to be structurally similar to GCP2 and GCP3 [3, 25]. Fission yeast, unlike budding yeast, contains homologs of GCP4, GCP5, and GCP6 (in fission yeast, Gfh1, Mod21, and Alp16, respectively), and these physically associate with  $\gamma$ -TuSC proteins [6, 26, 27]. However, the precise mechanistic role of fission yeast  $\gamma$ -TuRC-specific proteins is uncertain, because simultaneous deletion of *gfh1+*, *mod21+*, and *alp16+* has only a modest effect on microtubule nucleation in vivo [27]. We thus investigated whether  $\gamma$ -TuRC-specific proteins, even if not essential in the context of Mto1/2 complexes containing full-length Mto1, might nevertheless be required to support the minimal Mto1/2[bonsai] complexes. We analyzed *alp16 $\Delta$  mto1[bonsai]-GFP* cells, because Alp16 is required for association of both Gfh1 and Mod21 with  $\gamma$ -TuSC, and thus an *alp16 $\Delta$*  single-deletion mutant phenocopies the *gfh1 $\Delta$  mod21 $\Delta$  alp16 $\Delta$*  triple-deletion mutant [27, 28]. Mto1[bonsai]-GFP puncta in *alp16 $\Delta$*  cells were indistinguishable from those in wild-type (*alp16+*) cells, and these puncta also contained Alp4 (Figure 1G). The frequency and distribution of MT nucleation in *mto1[bonsai]-GFP alp16 $\Delta$*  cells was nearly identical to *mto1[bonsai]-GFP* (i.e., *alp16+*) cells, and this was also true for *mto1[NE]-GFP alp16 $\Delta$*  versus *mto1[NE]-GFP (alp16+)* (Figure S1G; Movie S1). We conclude that  $\gamma$ -TuRC-specific proteins do not make a major contribution to Mto1/2[bonsai]-driven MT nucleation.

#### Protein Copy Number within Individual Microtubule-Nucleation Complexes

The ability to image individual GFP-tagged Mto1/2[bonsai] and  $\gamma$ -TuC puncta as they nucleate single MTs allowed us to quantify protein copy number within individual nucleating puncta (Figures 2A and 2B). Using myosin light-chain Rlc1-GFP cytokinesis nodes as a fluorescence calibration standard [19], we measured signals of Mto1[bonsai]-GFP puncta and of Mto2-GFP, Alp4-GFP, and Alp6-GFP puncta in (untagged) *mto1[bonsai]* cells, just at the time of MT nucleation. Nucleating puncta contained an average of 12.8 and 13.0 molecules of Mto1[bonsai]-GFP and Mto2-GFP, respectively. These values are similar to the 13 protofilaments present in most template-nucleated MTs [29], and to the  $\sim$ 13–14  $\gamma$ -tubulin molecules thought to be present in a functional  $\gamma$ -TuRC [20, 30]. Nucleating puncta contained slightly more than half that number of molecules of Alp4-GFP and Alp6-GFP (average 8.5 and 8.4 molecules, respectively; Figure 2B). The near-equal values for Alp4 and Alp6 are consistent with puncta containing multiple copies of  $\gamma$ -TuSC, with numbers similar to those expected for GCP2 and GCP3 in a  $\gamma$ -TuRC [20, 30, 31]. Overall, our results suggest that the puncta we observe nucleating single MTs in vivo correspond to single macromolecular complexes with properties similar to single  $\gamma$ -TuRCs. The stoichiometry of Mto1[bonsai]:Mto2:Alp4:Alp6 in these  $\gamma$ -TuRC-like complexes is approximately 2:2:1:1, suggesting that each  $\gamma$ -TuSC in an actively nucleating complex may be associated with two copies each of Mto1[bonsai] and Mto2.

#### Role of Mto1 and Mto2 in Assembly of Multimeric Nucleation Complexes

Because nucleating puncta contain multiple copies of both  $\gamma$ -TuSC and Mto1/2 proteins, we next investigated how puncta assemble. Does a multimeric Mto1/2 complex drive assembly of a multimeric  $\gamma$ -TuC, or vice versa? Previous work has shown that in *mto1 $\Delta$*  cells,  $\gamma$ -TuSC proteins are not observed as freely

diffusing cytoplasmic puncta [28], suggesting that Mto1/2 is required for multimerization of free  $\gamma$ -TuSCs. As mentioned above, we found that Mto1[9A1-bonsai]-GFP is present in puncta even though it cannot bind the  $\gamma$ -TuC (Figures 3A, S2D, S2F, and S2G; Movie S3). Mto1[9A1-bonsai]-GFP puncta often appeared less numerous than Mto1[bonsai]-GFP puncta (Figures 3A and S2D), but because of their rapid diffusion in the cytoplasm (Movie S3), this was difficult to determine definitively. We therefore introduced the 9A1 mutation into Mto1[NE]-GFP. Mto1[9A1-NE]-GFP localized as stable NE-associated puncta that, like Mto1[9A1-bonsai]-GFP puncta, did not promote microtubule nucleation (Figure S3B). These results strongly suggest that Mto1/2 multimerization (i.e., puncta formation) can occur independently of interaction with  $\gamma$ -TuC and thus may drive assembly of multimeric  $\gamma$ -TuC. We note that it remains possible that further interaction with the  $\gamma$ -TuC could help to cooperatively stabilize multimeric Mto1/2 complexes [32] or regulate protein copy number within complexes.

How does Mto1/2 multimerize? In *mto2 $\Delta$*  cells, full-length Mto1-GFP localizes to conventional MTOCs, but the Mto1-GFP signal is less intense than in wild-type cells (Figure 3A; [9]). In immunoprecipitation experiments we found that Mto1 and Mto2 are the only major stoichiometric components of Mto1/2 complex isolated from cells (Figure S3A). This led us to hypothesize that Mto2 may be involved in multimerizing Mto1. Consistent with this, when *mto2+* was deleted in *Mto1[NE]-GFP* and *Mto1[bonsai]-GFP* cells, puncta were completely absent and no de novo cytoplasmic MT nucleation was observed (Figure 3A; Movie S4). Puncta were also absent from *Mto1[9A1-bonsai]-GFP mto2 $\Delta$*  cells (Figure 3A; Movie S3) and from *mto1(1-500)-GFP (mto2+)* cells, in which Mto2 is present but the Mto2-binding region of Mto1 (Mto1 amino acids 461–549) is disrupted (Figure S3C; [9]). We also found that free cytoplasmic Alp4 puncta were absent in *mto2 $\Delta$  mto1[bonsai]-GFP* cells, consistent with  $\gamma$ -TuC multimerization depending on the presence of Mto1/2 multimers (Figure S3D).

By contrast, when we imaged Mto2-GFP in *mto1 $\Delta$*  cells, we observed free cytoplasmic Mto2-GFP puncta (Figure 3B). Although these puncta were faint in still images, they could clearly be seen diffusing very rapidly by time-lapse imaging (Movie S5). They were also considerably more apparent when Mto2-GFP was mildly ( $\sim$ 5 $\times$  to 10 $\times$ ) overexpressed in *mto1 $\Delta$*  cells, whereas similarly overexpressed Mto1[bonsai]-GFP in *mto2 $\Delta$*  cells failed to form puncta and did not promote MT nucleation (Figures S3E and S3F). Overall, this suggests that multimeric Mto2 can exist in the absence of Mto1. Consistent with this, we found that Mto2 can be coimmunoprecipitated with itself, not only from wild-type but also from *mto1 $\Delta$*  cell extracts (Figure 3C).

To further investigate  $\gamma$ -TuC-independent multimerization of Mto1/2, we analyzed endogenous Mto1/2[9A1-bonsai]-GFP complex by glycerol density-gradient centrifugation and quantitative western blotting (Figure 4). In these experiments, Mto2 was tagged with SZZ to enable partial purification by binding to immunoglobulin G beads and cleavage with tobacco etch virus (TEV) protease (see Supplemental Experimental Procedures); the SZZ tag did not impair Mto2 function (Figure S3G). In cell lysates, Mto2-SZZ sedimented as a very broad peak centered at  $\sim$ 14S, with a full width at half maximum (FWHM) of eight or nine fractions (Figure 4A). By contrast, FWHM for monodisperse size standards was two or three fractions (Figure S3H). Sedimentation of Mto1[9A1-bonsai]-GFP was also broad but centered at  $\sim$ 8S, indicating partial dissociation

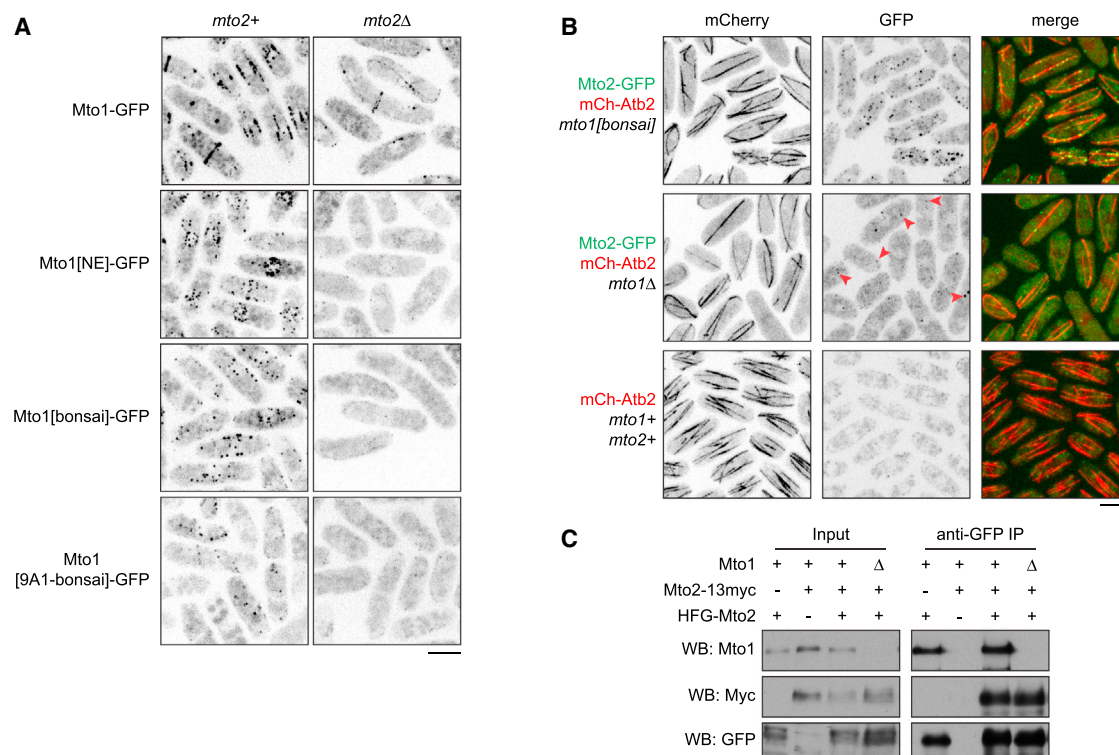

Figure 3. Assembly of Multimeric Puncta In Vivo

(A) Images showing puncta of Mto1[NE]-GFP, Mto1[bonsai]-GFP, and Mto1[9A1-bonsai]-GFP in wild-type backgrounds (*mto2+*) and absence of puncta in *mto2Δ* backgrounds. Mto1[9A1-bonsai]-GFP puncta diffuse rapidly but are prominent in movies (see [Movie S3](#)). Full-length Mto1-GFP displays a weak but still detectable signal in *mto2Δ* backgrounds, due to its intrinsic ability to enrich at many MTOC sites ([9]; see also [Figure 1A](#)). (B) Mto2-GFP puncta together with mCherry-tubulin (mCh-Atb2) in *mto1[bonsai]* and *mto1Δ* cells. Arrows indicate examples of puncta in *mto1Δ* cells, which are relatively faint and seen more easily in movies or when Mto2-GFP is overexpressed (see [Movie S5](#) and [Figure S3E](#)). Wild-type cells (*mto1+ mto2+*) provide a negative control for GFP fluorescence. (C) Mto2-13myc is coimmunoprecipitated with 6His-FLAG-GFP-Mto2 (HFG-Mto2), in both *mto1+* and *mto1Δ* backgrounds. Western blots were probed with antibodies against GFP, Myc, and Mto1. Scale bars, 5  $\mu$ m.

from Mto2-SZZ. Overall, this suggests that Mto1/2[9A1-bonsai]-GFP in cell lysates is likely present in several multimeric states.

Following partial purification, Mto2-S (the TEV protease cleavage product of Mto2-SZZ) was enriched 3,400-fold relative to total protein ([Supplemental Experimental Procedures](#)) and again sedimented as a broad peak (FWHM  $\sim$  five fractions), centered at  $\sim$ 12S ([Figure 4A](#)). Copurifying Mto1[9A1-bonsai]-GFP showed a more complex bimodal profile, which likely reflects further dissociation from Mto2-S after partial purification. Interestingly, after 10-fold concentration, both Mto2-S and Mto1[9A1-bonsai]-GFP sedimented as much larger species, represented by a long “tail” in the lower half of the gradient and a significantly increased proportion in the pellet fraction (corresponding to complexes  $>$  40S). To examine larger species in more detail, we repeated this experiment, but with a shorter centrifugation time ([Figure 4B](#)). This resolved the earlier “ $>$ 40S pellet” fraction into a range of larger species, with 15%–20% of total Mto2-S and Mto1[9A1-bonsai]-GFP still appearing in the pellet ( $>$ 100S) after the shorter centrifugation.

These observations are consistent with a concentration-dependent higher-order multimerization of the Mto1/2 complex, possibly in the form of a polymer with no intrinsic fixed length [22]. Importantly, although Mto2-S was enriched 3,400-fold after partial purification, Mto1[9A1-bonsai]-GFP was enriched only 200-fold, and  $\gamma$ -tubulin was not enriched

at all ([Supplemental Experimental Procedures](#)). This suggests that Mto1[9A1-bonsai]-GFP may make only a minor contribution to the assembly of higher-order complexes observed here and, moreover, that this assembly does not depend on any residual weak interaction with the  $\gamma$ -TuC.

To extend these observations, we repeated the above experiments in an *mto1Δ* background, both in cell lysates and after partial purification of Mto2-S ([Figures 4C](#) and [4D](#)). In the absence of Mto1, Mto2-SZZ in cell lysates sedimented as a broad peak centered at 9S (FWHM  $\sim$  six fractions), consistent with the presence of Mto2 multimers. The profile of partially purified Mto2-S was only modestly different (peak center 8S, FWHM  $\sim$  five fractions). However, after 10-fold concentration, we observed a greatly increased proportion of Mto2-S in the pellet, with both long and short centrifugation times ([Figures 4C](#) and [4D](#)). Interestingly, the  $\sim$ 40–100S “tail” of concentrated Mto2-S species obtained from the *mto1[9A1-bonsai]-GFP* background ([Figure 4B](#)) was absent in material from *mto1Δ* cells ([Figure 4D](#)), which could suggest that Mto1[9A1-bonsai]-GFP contributes to the cooperative assembly of higher S-value complexes. However, at the same time, because a greater proportion of Mto2-S was observed in the pellet from *mto1Δ* cells compared to *mto1[9A1-bonsai]-GFP* cells, this could equally suggest that Mto1[9A1-bonsai]-GFP actually limits the extent of Mto2-S assembly into very large ( $>$ 100S) complexes. Taken together, our results indicate that although Mto1 may influence the assembly of Mto1/2

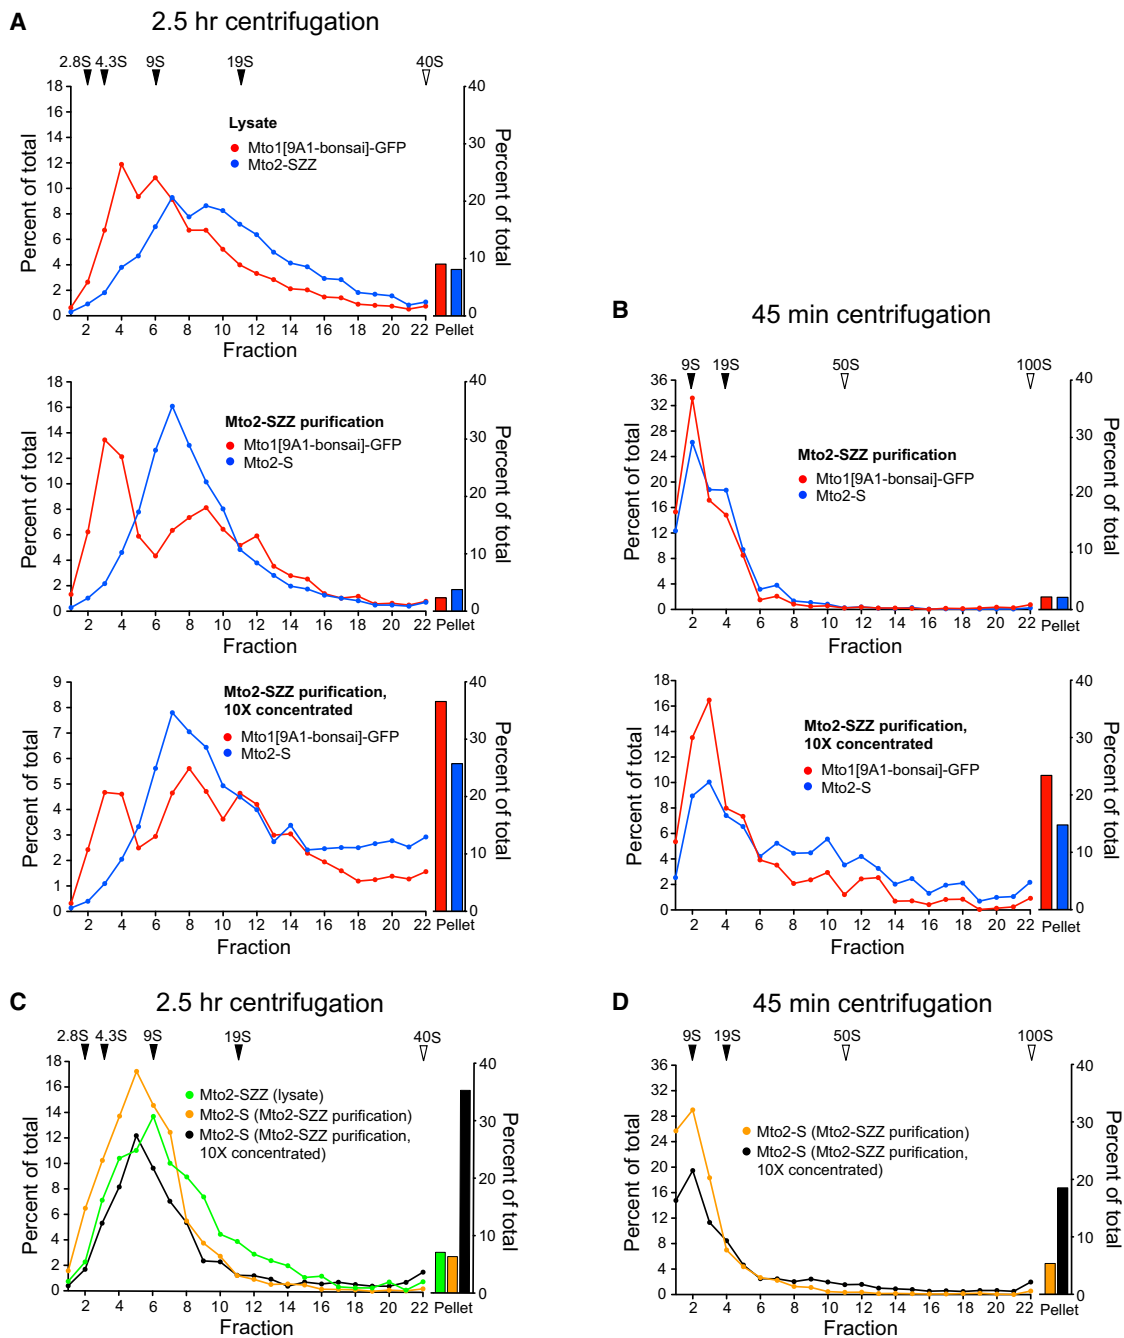

Figure 4. Concentration-Dependent Assembly of Mto1/2[bonsai] and Mto2 into Higher-Order Complexes In Vitro

(A) Sedimentation of Mto1[9A1-bonsai]-GFP and Mto2-SZZ (or Mto2-S) in cell lysates, after Mto2-based partial purification from lysates, and after concentration of the partially purified material, as indicated. Quantitative western blotting from 2.5 hr isokinetic glycerol density-gradient centrifugation is shown. Solid triangles indicate measured S values; open triangles indicate extrapolated S values (see Figure S3H).

(B) Samples as in (A), but centrifuged for only 45 min.

(C) Sedimentation of Mto2-SZZ in *mto1Δ* cell lysates, Mto2-S after partial purification from *mto1Δ* lysates, and Mto2-S after concentration of the partially purified material from *mto1Δ* lysates. Centrifugation and quantification were as in (A).

(D) Samples as in (C), but centrifuged for 45 min.

complexes, Mto1 is not absolutely necessary for Mto2 to assemble in higher-order complexes.

### Conclusions

Overall, our experiments with Mto1/2[bonsai], a “minimal” Mto1/2 complex, demonstrate that Mto1/2 complex can

activate MT nucleation by the fission yeast  $\gamma$ -TuC independently of localizing the  $\gamma$ -TuC to any specific location within the cell. While  $\gamma$ -TuRC-specific proteins are not required, multimeric Mto1/2 puncta are critical for MT nucleation and can form independently of interaction with the  $\gamma$ -TuC. Our results suggest that multimerization of  $\gamma$ -TuSCs by Mto1/2 may

generate the same type of supramolecular architecture as is found in conventional  $\gamma$ -TuRCs, but via an alternative mode of assembly (Figure S31). It will be interesting to investigate where such alternative  $\gamma$ -TuRC-like complexes may be used in other eukaryotic systems, including metazoans, as mutations in a mammalian homolog of Mto1, CDK5RAP2, lead to microcephaly [33, 34]. Combining localization and multimerization functions in wild-type Mto1/2 may be a particularly efficient method of spatially controlling MT nucleation, especially when the total number of MTs (and nucleation complexes) in the cell is low and when different prospective MTOC sites compete for these complexes.

Single-molecule electron microscopy studies have suggested that conformational changes within interacting  $\gamma$ -TuSCs may be important in generating an active MT nucleator [3, 22, 35]. This idea is attractive but still awaits experimental confirmation. The CM1 region of Mto1 is conserved in proteins from yeast to humans and is required for interaction with the  $\gamma$ -TuC [13, 36, 37], and there is good evidence that the CDK5RAP2 CM1 region alone can function as an activator of the mammalian  $\gamma$ -TuRC, although the mechanism remains unclear [14]. Our results do not address whether the Mto1 CM1 region alone has a similar specific activating role, because in the fission yeast system, as we have shown here, MT nucleation by Mto1[bonsai] further requires Mto2-dependent multimerization. In the future, such questions may best be addressed through reconstitution of complete MT-nucleating complexes from purified components.

#### Experimental Procedures

Standard yeast genetic methods [38, 39] were used throughout. All fluorescence microscopy used a spinning-disk fluorescence microscope, as described previously [28, 40], with cells mounted on medium agarose pads between a slide and coverslip [41]. Further details of these and biochemistry experiments can be found in Supplemental Experimental Procedures.

#### Supplemental Information

Supplemental Information includes three figures, Supplemental Experimental Procedures, and five movies and can be found with this article online at <http://dx.doi.org/10.1016/j.cub.2014.03.006>.

#### Acknowledgments

We thank members of our laboratory and the Wellcome Centre Wednesday Floor Meeting for helpful discussions, H. Ohkura for comments on the manuscript, D. Busso and A. Matsuyama for plasmids, Y. Watanabe for the mCherry-tubulin strain, and D. Kelly and A. Anders for help with microscopy and biochemistry, respectively. This work was supported by Wellcome Trust grant 094517 to K.E.S. E.M.L. was supported by a PhD studentship from the Darwin Trust of Edinburgh. L.M.G. was supported by a PhD studentship from the Biotechnology and Biological Sciences Research Council UK. W.E.B. was supported by a Cancer Research UK PhD Studentship (C20060/A10789). The Wellcome Trust Centre for Cell Biology is supported by core funding from the Wellcome Trust (092076).

Received: July 9, 2013

Revised: February 17, 2014

Accepted: March 4, 2014

Published: April 3, 2014

#### References

1. Stearns, T., and Kirschner, M. (1994). In vitro reconstitution of centrosome assembly and function: the central role of gamma-tubulin. *Cell* 76, 623–637.
2. Zheng, Y., Wong, M.L., Alberts, B., and Mitchison, T. (1995). Nucleation of microtubule assembly by a gamma-tubulin-containing ring complex. *Nature* 378, 578–583.
3. Kollman, J.M., Merdes, A., Mourey, L., and Agard, D.A. (2011). Microtubule nucleation by  $\gamma$ -tubulin complexes. *Nat. Rev. Mol. Cell Biol.* 12, 709–721.
4. Teixidó-Travesa, N., Roig, J., and Lüders, J. (2012). The where, when and how of microtubule nucleation - one ring to rule them all. *J. Cell Sci.* 125, 4445–4456.
5. Sawin, K.E., and Snaith, H.A. (2004). Role of microtubules and tea1p in establishment and maintenance of fission yeast cell polarity. *J. Cell Sci.* 117, 689–700.
6. Venkatram, S., Tasto, J.J., Feoktistova, A., Jennings, J.L., Link, A.J., and Gould, K.L. (2004). Identification and characterization of two novel proteins affecting fission yeast gamma-tubulin complex function. *Mol. Biol. Cell* 15, 2287–2301.
7. Janson, M.E., Setty, T.G., Paoletti, A., and Tran, P.T. (2005). Efficient formation of bipolar microtubule bundles requires microtubule-bound gamma-tubulin complexes. *J. Cell Biol.* 169, 297–308.
8. Venkatram, S., Jennings, J.L., Link, A., and Gould, K.L. (2005). Mto2p, a novel fission yeast protein required for cytoplasmic microtubule organization and anchoring of the cytokinetic actin ring. *Mol. Biol. Cell* 16, 3052–3063.
9. Samejima, I., Lourenço, P.C., Snaith, H.A., and Sawin, K.E. (2005). Fission yeast mto2p regulates microtubule nucleation by the centrosomin-related protein mto1p. *Mol. Biol. Cell* 16, 3040–3051.
10. Samejima, I., Miller, V.J., Rincon, S.A., and Sawin, K.E. (2010). Fission yeast Mto1 regulates diversity of cytoplasmic microtubule organizing centers. *Curr. Biol.* 20, 1959–1965.
11. Sawin, K.E., and Tran, P.T. (2006). Cytoplasmic microtubule organization in fission yeast. *Yeast* 23, 1001–1014.
12. Pardo, M., and Nurse, P. (2003). Equatorial retention of the contractile actin ring by microtubules during cytokinesis. *Science* 300, 1569–1574.
13. Samejima, I., Miller, V.J., Grocock, L.M., and Sawin, K.E. (2008). Two distinct regions of Mto1 are required for normal microtubule nucleation and efficient association with the gamma-tubulin complex in vivo. *J. Cell Sci.* 121, 3971–3980.
14. Choi, Y.K., Liu, P., Sze, S.K., Dai, C., and Qi, R.Z. (2010). CDK5RAP2 stimulates microtubule nucleation by the gamma-tubulin ring complex. *J. Cell Biol.* 191, 1089–1095.
15. Sawin, K.E., Lourenço, P.C., and Snaith, H.A. (2004). Microtubule nucleation at non-spindle pole body microtubule-organizing centers requires fission yeast centrosomin-related protein mod20p. *Curr. Biol.* 14, 763–775.
16. Ciferri, C., Pasqualato, S., Screpanti, E., Varetto, G., Santaguida, S., Dos Reis, G., Maiolica, A., Polka, J., De Luca, J.G., De Wulf, P., et al. (2008). Implications for kinetochore-microtubule attachment from the structure of an engineered Ndc80 complex. *Cell* 133, 427–439.
17. Widlund, P.O., Stear, J.H., Pozniakovskiy, A., Zanic, M., Reber, S., Brouhard, G.J., Hyman, A.A., and Howard, J. (2011). XMAP215 polymerase activity is built by combining multiple tubulin-binding TOG domains and a basic lattice-binding region. *Proc. Natl. Acad. Sci. USA* 108, 2741–2746.
18. Zimmerman, S., and Chang, F. (2005). Effects of gamma-tubulin complex proteins on microtubule nucleation and catastrophe in fission yeast. *Mol. Biol. Cell* 16, 2719–2733.
19. Laporte, D., Coffman, V.C., Lee, I.J., and Wu, J.Q. (2011). Assembly and architecture of precursor nodes during fission yeast cytokinesis. *J. Cell Biol.* 192, 1005–1021.
20. Oegema, K., Wiese, C., Martin, O.C., Milligan, R.A., Iwamatsu, A., Mitchison, T.J., and Zheng, Y. (1999). Characterization of two related Drosophila gamma-tubulin complexes that differ in their ability to nucleate microtubules. *J. Cell Biol.* 144, 721–733.
21. Murphy, S.M., Preble, A.M., Patel, U.K., O'Connell, K.L., Dias, D.P., Moritz, M., Agard, D., Stults, J.T., and Stearns, T. (2001). GCP5 and GCP6: two new members of the human gamma-tubulin complex. *Mol. Biol. Cell* 12, 3340–3352.
22. Kollman, J.M., Polka, J.K., Zelter, A., Davis, T.N., and Agard, D.A. (2010). Microtubule nucleating gamma-TuSC assembles structures with 13-fold microtubule-like symmetry. *Nature* 466, 879–882.
23. Knop, M., Pereira, G., Geissler, S., Grein, K., and Schiebel, E. (1997). The spindle pole body component Spc97p interacts with the gamma-tubulin of *Saccharomyces cerevisiae* and functions in microtubule organization and spindle pole body duplication. *EMBO J.* 16, 1550–1564.



24. Vardy, L., and Toda, T. (2000). The fission yeast gamma-tubulin complex is required in G(1) phase and is a component of the spindle assembly checkpoint. *EMBO J.* *19*, 6098–6111.
25. Guillet, V., Knibiehler, M., Gregory-Pauron, L., Remy, M.H., Chemin, C., Raynaud-Messina, B., Bon, C., Kollman, J.M., Agard, D.A., Merdes, A., and Mourey, L. (2011). Crystal structure of  $\gamma$ -tubulin complex protein GCP4 provides insight into microtubule nucleation. *Nat. Struct. Mol. Biol.* *18*, 915–919.
26. Fujita, A., Vardy, L., Garcia, M.A., and Toda, T. (2002). A fourth component of the fission yeast gamma-tubulin complex, Alp16, is required for cytoplasmic microtubule integrity and becomes indispensable when gamma-tubulin function is compromised. *Mol. Biol. Cell* *13*, 2360–2373.
27. Anders, A., Lourenço, P.C., and Sawin, K.E. (2006). Noncore components of the fission yeast gamma-tubulin complex. *Mol. Biol. Cell* *17*, 5075–5093.
28. Anders, A., and Sawin, K.E. (2011). Microtubule stabilization in vivo by nucleation-incompetent  $\gamma$ -tubulin complex. *J. Cell Sci.* *124*, 1207–1213.
29. Evans, L., Mitchison, T., and Kirschner, M. (1985). Influence of the centrosome on the structure of nucleated microtubules. *J. Cell Biol.* *100*, 1185–1191.
30. Moritz, M., Braunfeld, M.B., Guénebaud, V., Heuser, J., and Agard, D.A. (2000). Structure of the gamma-tubulin ring complex: a template for microtubule nucleation. *Nat. Cell Biol.* *2*, 365–370.
31. Erlemann, S., Neuner, A., Gombos, L., Gibeaux, R., Antony, C., and Schiebel, E. (2012). An extended  $\gamma$ -tubulin ring functions as a stable platform in microtubule nucleation. *J. Cell Biol.* *197*, 59–74.
32. Williamson, J.R. (2008). Cooperativity in macromolecular assembly. *Nat. Chem. Biol.* *4*, 458–465.
33. Bond, J., Roberts, E., Springell, K., Lizarraga, S.B., Scott, S., Higgins, J., Hampshire, D.J., Morrison, E.E., Leal, G.F., Silva, E.O., et al. (2005). A centrosomal mechanism involving CDK5RAP2 and CENPJ controls brain size. *Nat. Genet.* *37*, 353–355.
34. Lizarraga, S.B., Margossian, S.P., Harris, M.H., Campagna, D.R., Han, A.P., Blevins, S., Mudbhary, R., Barker, J.E., Walsh, C.A., and Fleming, M.D. (2010). Cdk5rap2 regulates centrosome function and chromosome segregation in neuronal progenitors. *Development* *137*, 1907–1917.
35. Kollman, J.M., Zelter, A., Muller, E.G., Fox, B., Rice, L.M., Davis, T.N., and Agard, D.A. (2008). The structure of the gamma-tubulin small complex: implications of its architecture and flexibility for microtubule nucleation. *Mol. Biol. Cell* *19*, 207–215.
36. Fong, K.W., Choi, Y.K., Rattner, J.B., and Qi, R.Z. (2008). CDK5RAP2 is a pericentriolar protein that functions in centrosomal attachment of the gamma-tubulin ring complex. *Mol. Biol. Cell* *19*, 115–125.
37. Zhang, J., and Megraw, T.L. (2007). Proper recruitment of gamma-tubulin and D-TACC/Msps to embryonic Drosophila centrosomes requires Centrosomin Motif 1. *Mol. Biol. Cell* *18*, 4037–4049.
38. Moreno, S., Klar, A., and Nurse, P. (1991). Molecular genetic analysis of fission yeast *Schizosaccharomyces pombe*. *Methods Enzymol.* *194*, 795–823.
39. Bähler, J., Wu, J.Q., Longtine, M.S., Shah, N.G., McKenzie, A., 3rd, Steever, A.B., Wach, A., Philippsen, P., and Pringle, J.R. (1998). Heterologous modules for efficient and versatile PCR-based gene targeting in *Schizosaccharomyces pombe*. *Yeast* *14*, 943–951.
40. Snaith, H.A., Thompson, J., Yates, J.R., 3rd, and Sawin, K.E. (2011). Characterization of Mug33 reveals complementary roles for actin cable-dependent transport and exocyst regulators in fission yeast exocytosis. *J. Cell Sci.* *124*, 2187–2199.
41. Sawin, K.E. (1999). GFP fusion proteins as probes for cytology in fission yeast. *Methods Cell Biol.* *58*, 123–138.



**Current Biology, Volume 24**

**Supplemental Information**

## **Activation of the $\gamma$ -Tubulin Complex**

### **by the Mto1/2 Complex**

**Eric M. Lynch, Lynda M. Groocock, Weronika E. Borek, and Kenneth E. Sawin**

Suppl. Fig. S1

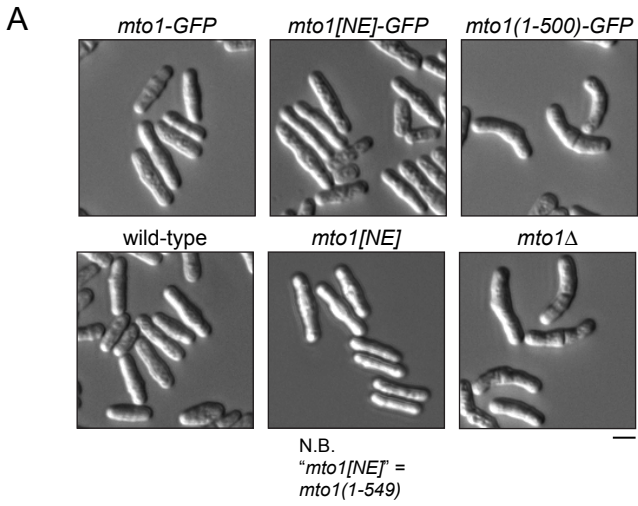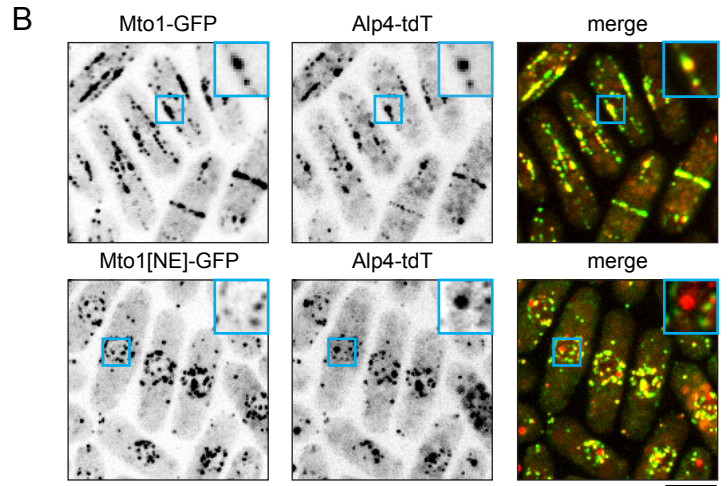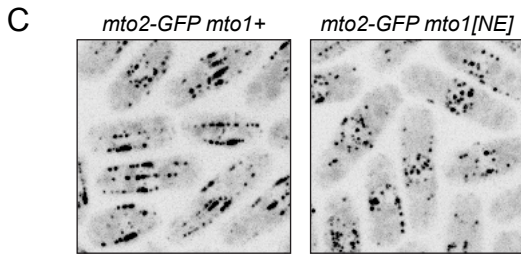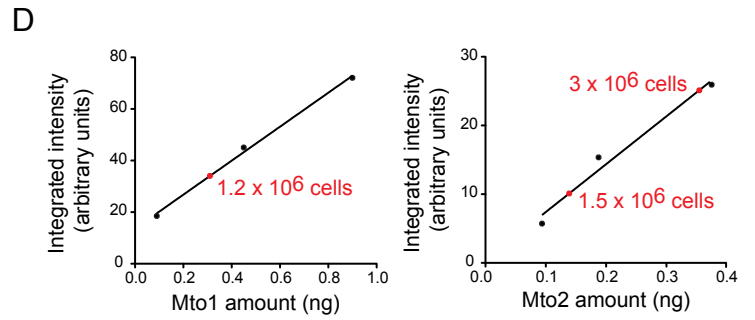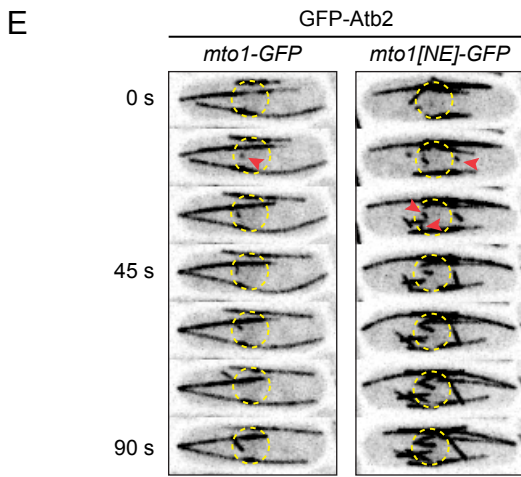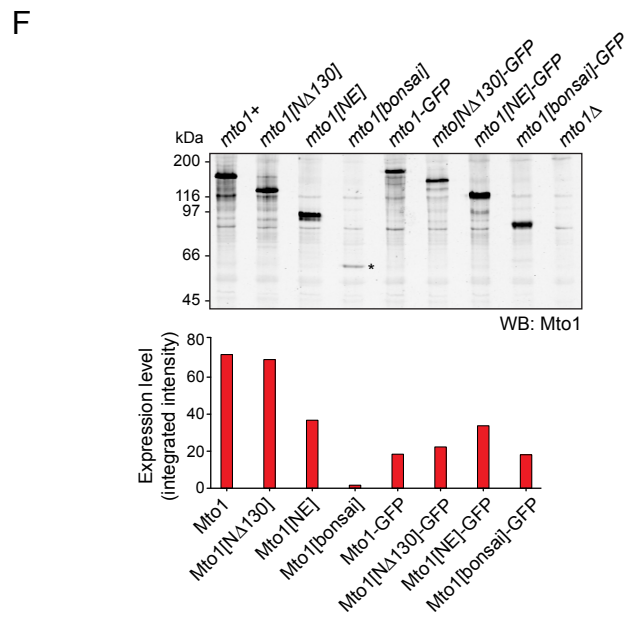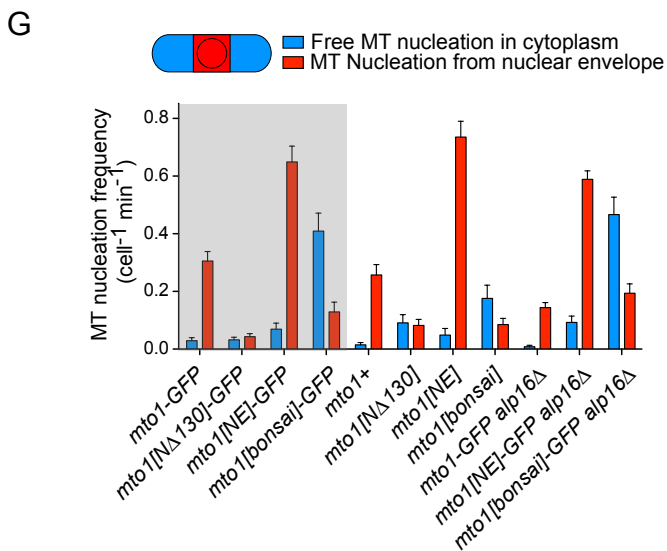

**Supplemental Figure S1: Localization of Mto1[NE], protein levels, and microtubule nucleation frequencies.**

**(A)** Cell morphology for the indicated strains after return-to-growth from stationary phase [S1, S2].

**(B)** Localization of full-length Mto1-GFP or Mto1[NE]-GFP, together with the  $\gamma$ -TuC protein Alp4 (GCP2 homolog) fused to tandem-dimer Tomato (Alp4-tdT). Large panels are maximum projections of the entire cell volume. Insets correspond to the blue squares in large panels and are maximum projections of the three Z-sections containing the spindle pole body (SPB). Alp4-tdT colocalizes with Mto1[NE]-GFP, except at the SPB itself, where Mto1[NE]-GFP is absent but Alp4-tdT is present, presumably because of its association with the Mto1 paralog Pcp1 on the intranuclear face of the SPB [S3, S4].

**(C)** Localization of Mto2-GFP in *mto1+* and *mto1[NE]* cells.

**(D)** Amounts of Mto1 and Mto2 in fission yeast extracts from the indicated numbers of cells (red data points), determined by quantitative western blotting and calibration with known amounts of recombinant Mto1 and Mto2 (black data points). These correspond to ~1200-1400 molecules per cell for both Mto1 and Mto2.

**(E)** Time-lapse images (15 s interval) of GFP-tubulin (GFP-Atb2) in *mto1-GFP* and *mto1[NE]-GFP* cells. Arrows indicate *de novo* microtubule (MT) nucleation events. Circles indicate position of the nucleus. Relative to GFP-tubulin, Mto1-GFP and Mto1[NE]-GFP are too faint to be seen here. See Suppl. Movie S1 for corresponding movies.

**(F)** Anti-Mto1 Western blot showing Mto1 levels for the indicated strains. Asterisk indicates untagged Mto1[*bonsai*]. Corresponding quantification of expression levels is shown below.

**(G)** Frequency of *de novo* MT nucleation ( $\pm$ SEM) free in the cytoplasm vs. in the nuclear envelope region for the indicated strains, as determined from time-lapse imaging of GFP-tubulin. Gray box shows data reproduced from Fig. 1F, for comparison. The apparent low total MT nucleation frequency in full-length *mto1* and *mto1[N $\Delta$ 130]* strains, both in the presence or absence of a GFP tag and/or *alp16 $\Delta$* , is an artifact of measurement methods; in these cells, a significant proportion of nucleation occurs on pre-existing MTs but cannot be quantified and thus is excluded from analysis. Taking this into consideration, appropriate comparisons can be made between different strains. The lower nucleation frequency in untagged *mto1[bonsai]* cells compared to *mto1[bonsai]-GFP* cells is likely due to the lower steady-state levels of untagged Mto1[*bonsai*] protein, as shown in panel (F). Bars, 5  $\mu$ m.

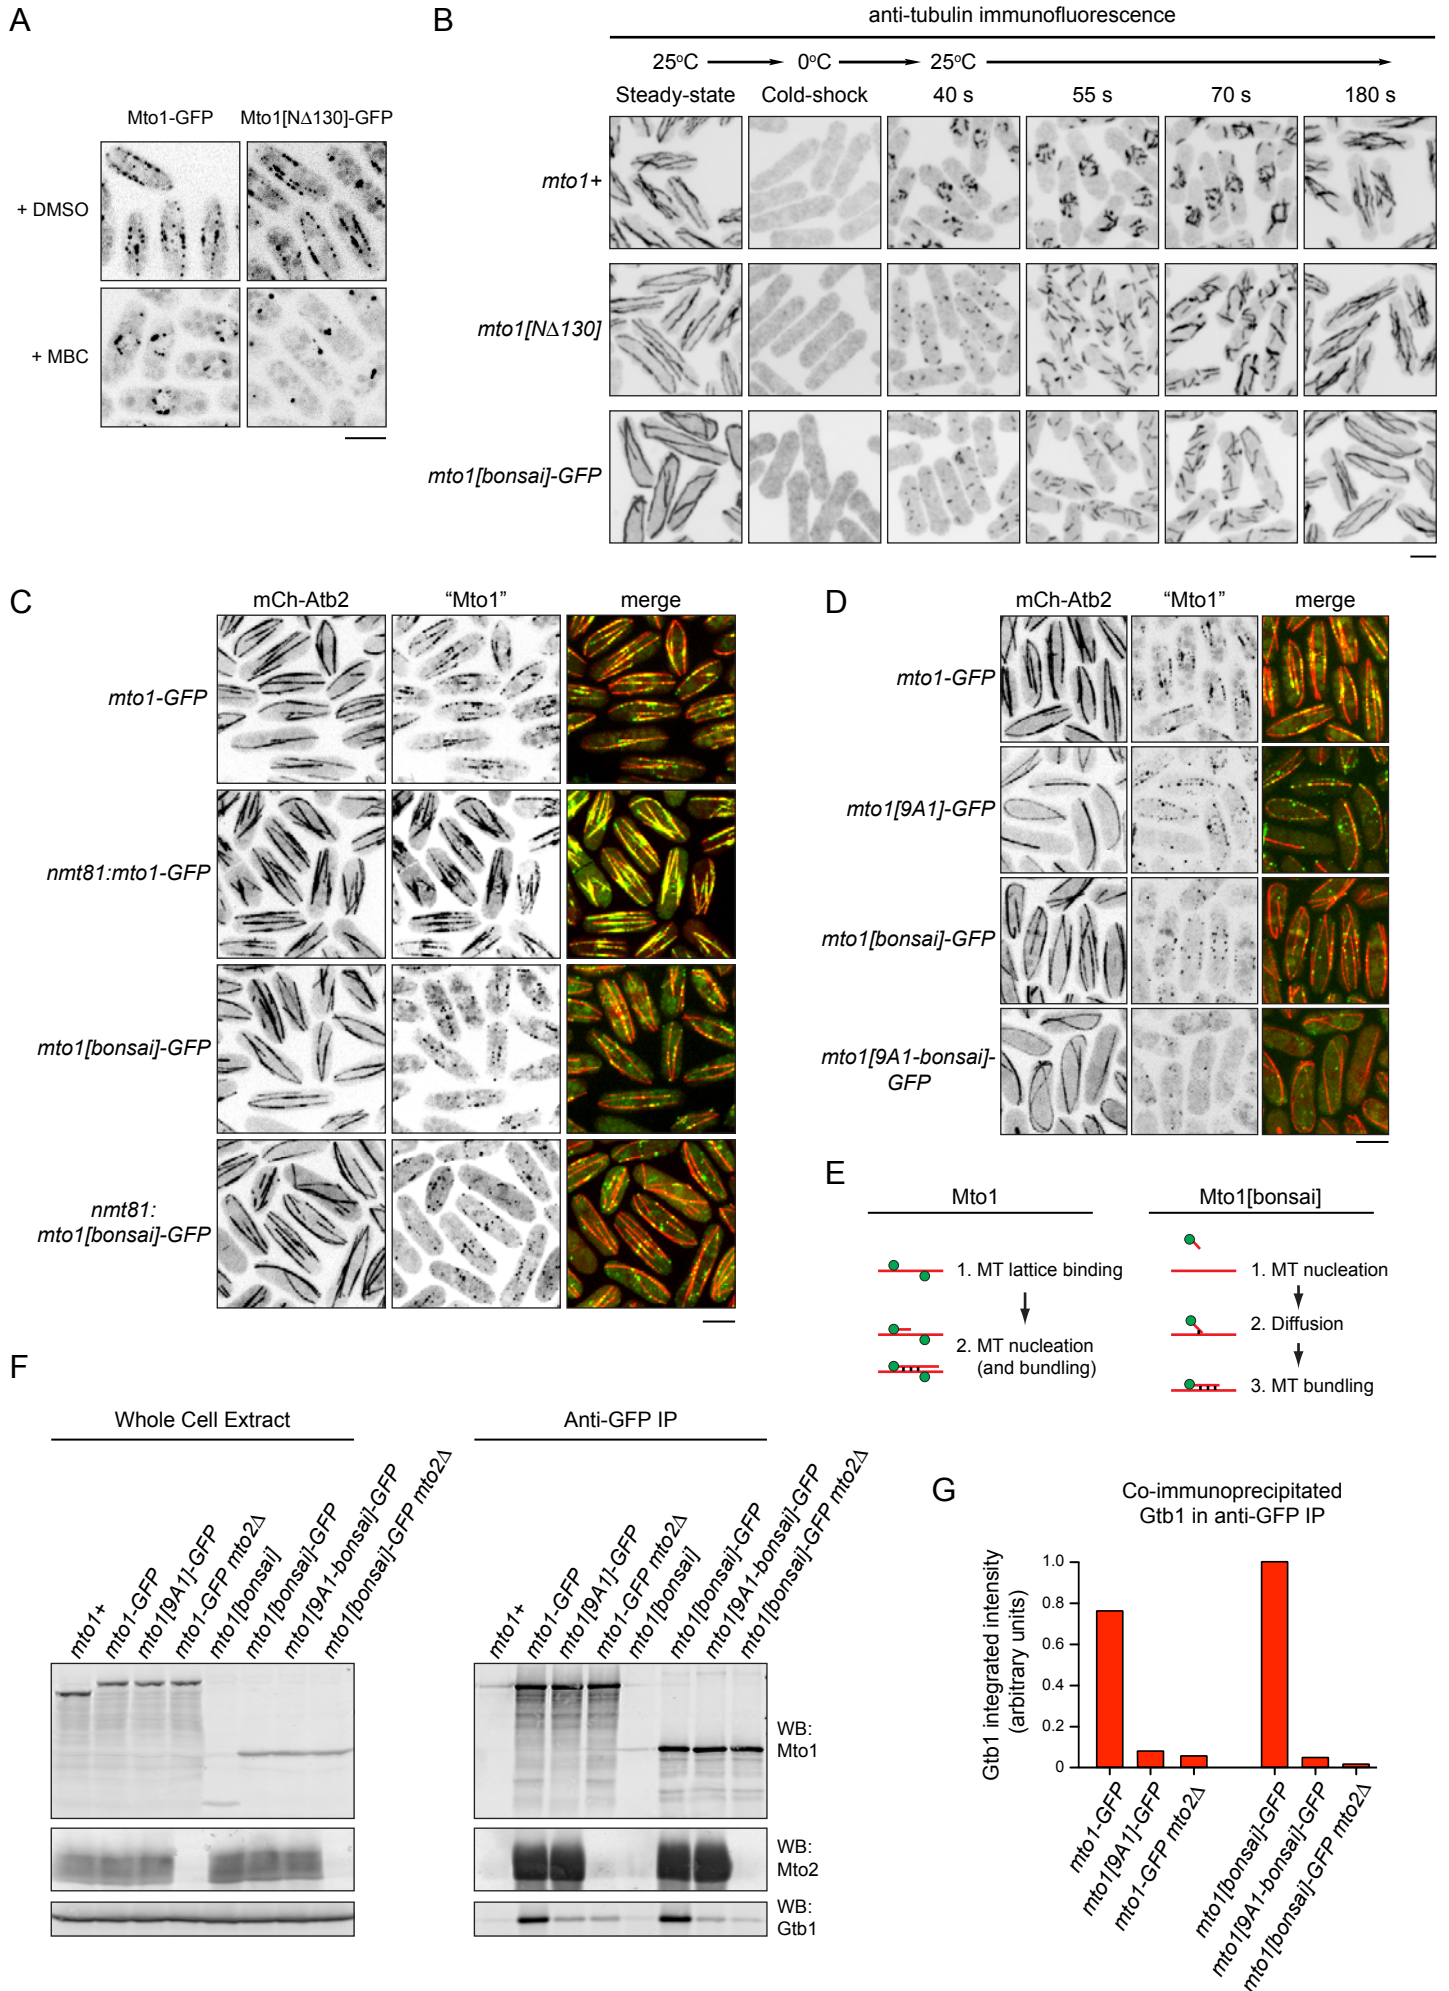



## Supplemental Figure S2: Characterization of Mto1[N $\Delta$ 130] and Mto1[bonsai].

**(A)** Localization of Mto1-GFP and Mto1[N $\Delta$ 130]-GFP, expressed from the endogenous *mto1* promoter, in control cells and after microtubule (MT) depolymerization by methyl benzimidazol-2-yl-carbamate (MBC).

**(B)** Anti-tubulin immunofluorescence showing time-course and spatial distribution of MT regrowth after cold-induced MT depolymerization in *mto1+* and *mto1*[N $\Delta$ 130] cells (both with untagged Mto1) and in *mto1*[bonsai]-GFP cells.

**(C)** Localization of Mto1-GFP and Mto1[bonsai]-GFP, expressed from the endogenous *mto1* promoter or overexpressed from the *nmt81* promoter (~6X overexpression relative to endogenous; [S5]), together with mCherry-tubulin (mCh-Atb2). Overexpressed Mto1-GFP effectively coats the entire MT lattice, while overexpressed Mto1[bonsai]-GFP is seen only in puncta at the minus-ends of recently-nucleated MTs that have become incorporated into MT bundles after nucleation (see also Supplementary Movie S2). Because of the increased fluorescent signal of overexpressed proteins, images of *nmt81*:Mto1-GFP and *nmt81*:Mto1[bonsai]-GFP proteins are scaled approximately four-fold lower (on absolute scale) than images of endogenous expression.

**(D)** Localization of different versions of Mto1, together with mCherry-tubulin (mCh-Atb2). 1) Mto1-GFP localization to MTs is robust. 2) Mto1[9A1]-GFP localization to MTs results solely from association of the C-terminal region of Mto1 with the MT lattice (see Fig. 1A), because “9A1” proteins cannot interact with the  $\gamma$ -TuSC and do not promote *de novo* cytoplasmic MT nucleation ([S6]; see also Suppl. Fig. S2F,G). As described in main text, the few MTs present in “9A1” mutants are the result of escape of intranuclear mitotic spindle MTs into the cytoplasm [S2]. 3) Mto1[bonsai]-GFP localization to MT bundles results from the fact that Mto1/2[bonsai] remains associated with MT minus-ends after nucleation, as described for panel (C) above and in main text. 4) Mto1[9A1-bonsai]-GFP does not localize significantly to MTs, because it lacks both modes of association with MTs (i.e. lattice-binding and minus-end-binding), and therefore diffuses freely inside cells (see Supplementary Movie S3).

**(E)** Cartoon summarizing the contrasting mechanisms by which full-length Mto1 and Mto1[bonsai] can become localized to MT bundles *in vivo*.

**(F)** Anti-Mto1, anti-Mto2, and anti- $\gamma$ -tubulin (Gtb1) western blots of whole cell extracts and anti-GFP immunoprecipitates from yeast cells expressing the indicated GFP-tagged forms of Mto1, in either wild-type (*mto2+*) or *mto2* $\Delta$  backgrounds. Untagged *mto1+* (i.e. wild-type) and *mto1*[bonsai] cells serve as controls.

**(G)** Quantification of co-immunoprecipitated Gtb1 from anti-GFP immunoprecipitations shown in panel (F). The Gtb1 signal in each immunoprecipitate was divided by the Mto1 signal in the same immunoprecipitate, and these values were then normalized relative to the value from *mto1*[bonsai]-GFP cells. These experiments demonstrate three results: First, Mto1-GFP and Mto1[bonsai]-GFP co-immunoprecipitate similar amounts of  $\gamma$ -tubulin complex and of Mto2. Second, analysis of the “9A1” mutants, in which nine consecutive amino acids within the Mto1 CM1 region are mutated to alanine (see Fig. 1A; [S6]), shows that Mto1[bonsai], like full-length Mto1, requires an intact CM1 region in order to interact with the  $\gamma$ -tubulin complex. Third, analysis of *mto2* $\Delta$  mutants shows that Mto1[bonsai], like full-length Mto1, does not interact efficiently with the  $\gamma$ -tubulin complex in *mto2* $\Delta$  cells. Bars, 5  $\mu$ m.

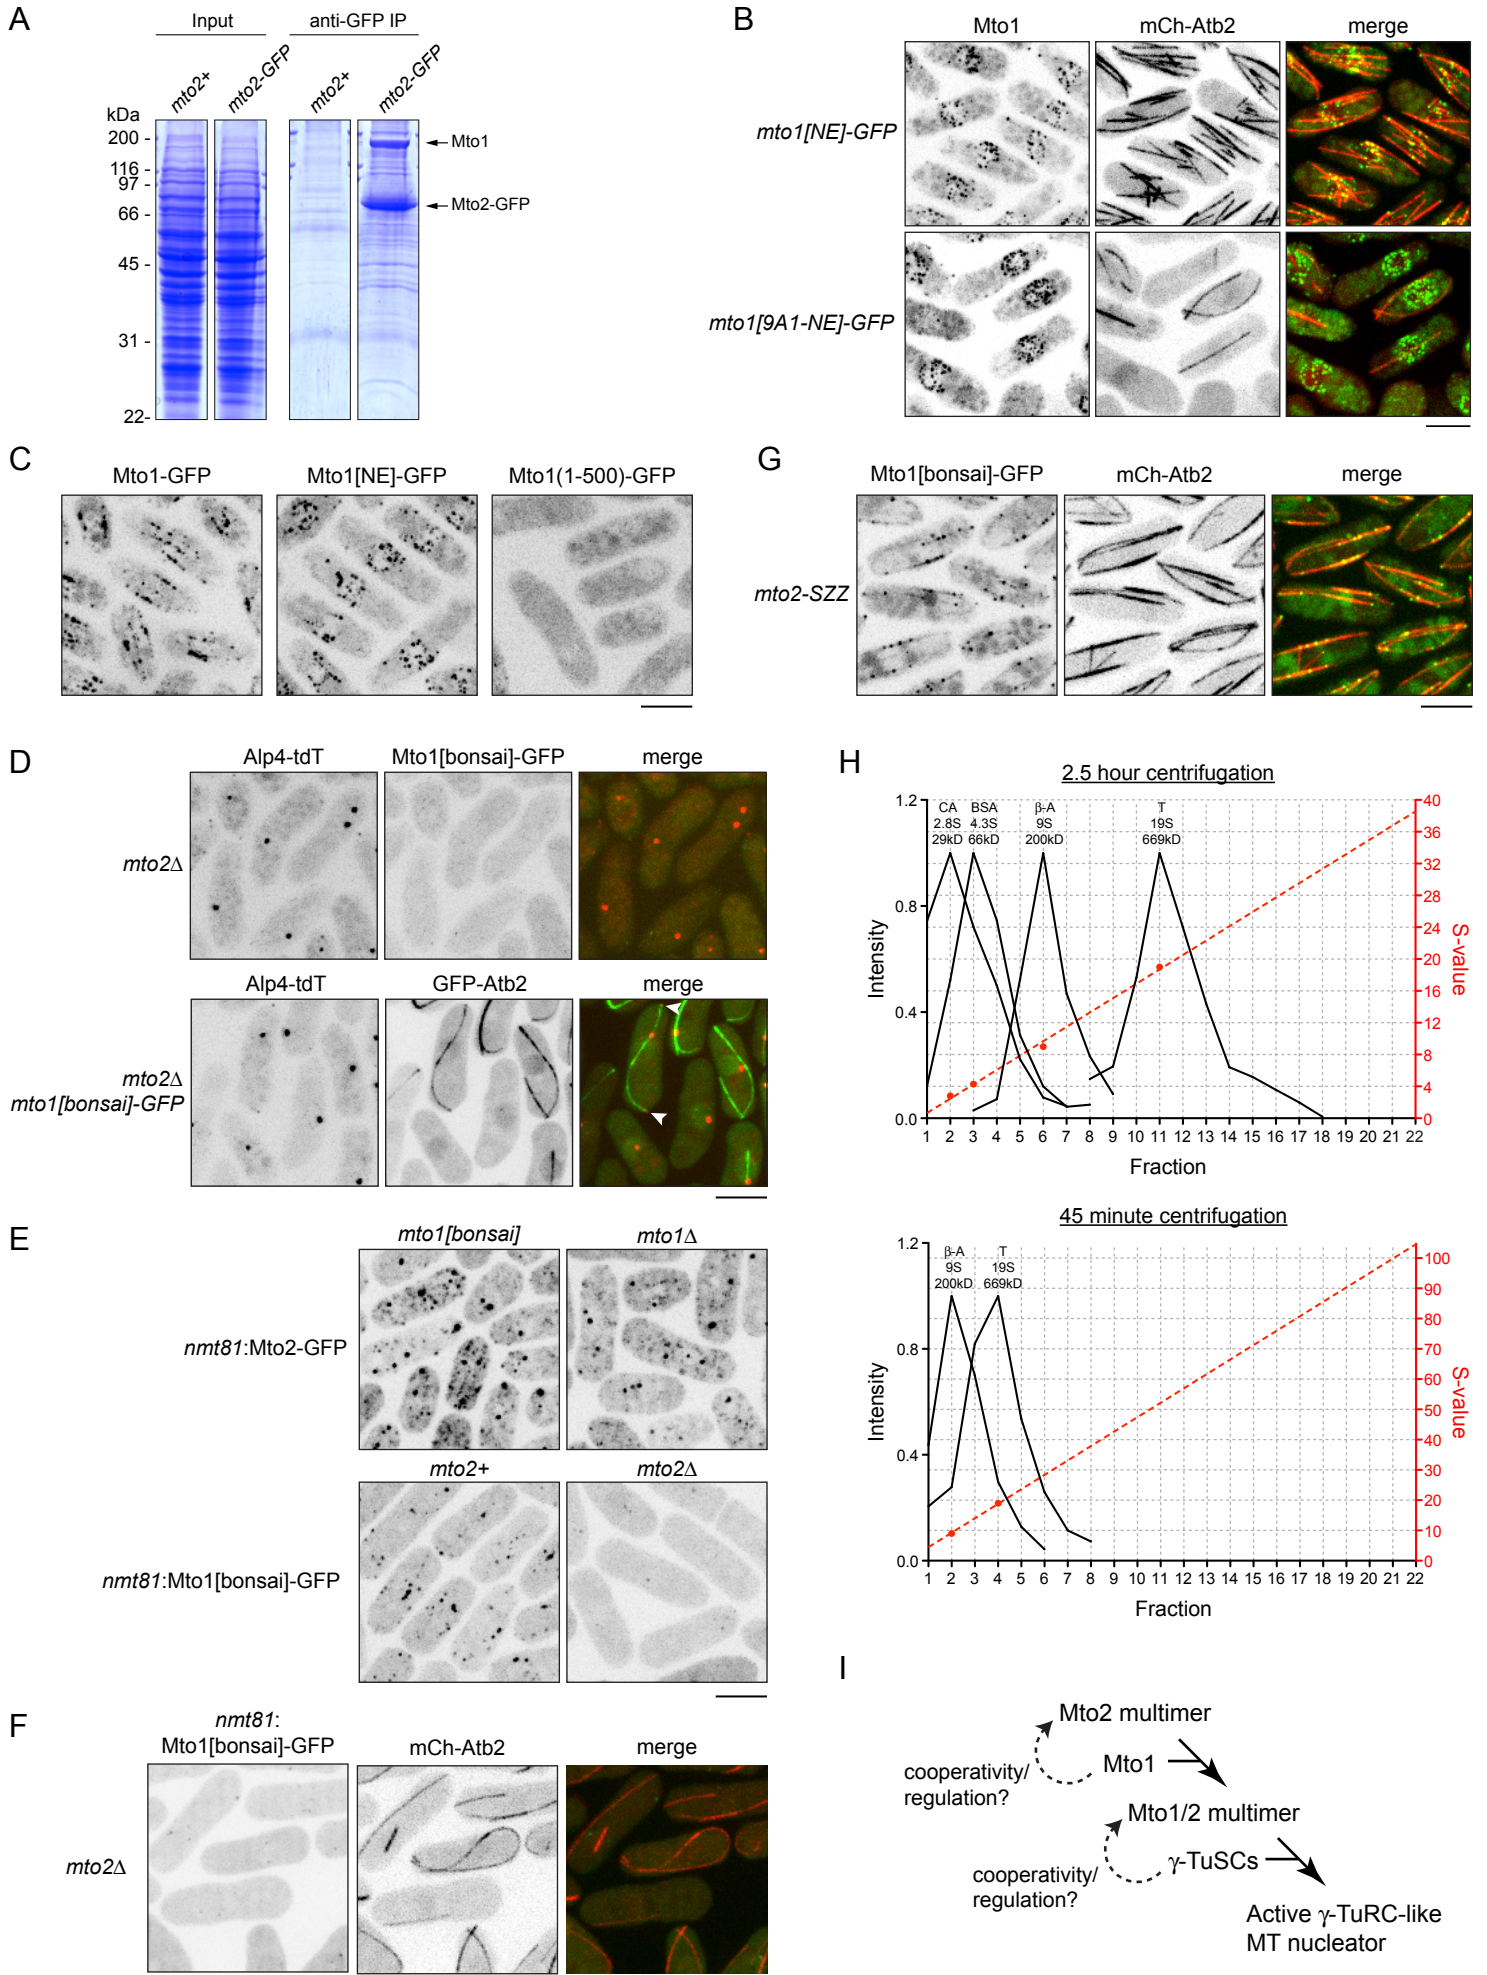

### Supplemental Figure S3: Role of Mto1 and Mto2 in Mto1/2[bonsai] puncta formation.

**(A)** Coomassie-blue stain of anti-GFP immunoprecipitations from *mto2-GFP* cells and control wild-type (*mto2+*) cells. Mto1 and Mto2 are the only major stoichiometric components. Note that although  $\gamma$ -tubulin complex proteins are readily detected in Mto1/2 immunoprecipitations by Western blot ([S2, S5, S6]; Suppl. Fig. S2F), the majority of Mto1/2-associated  $\gamma$ -tubulin complex does not survive cell extraction and immunoprecipitation. Mto1 rather than Mto1[bonsai] was used in this experiment because untagged Mto1[bonsai] is relatively unstable *in vivo* (see Suppl. Fig. S1F).

**(B)** Localization of Mto1[NE]-GFP and Mto1[9A1-NE]-GFP puncta to the nuclear envelope, together with mCh-Atb2. Like other “9A1” mutants, *mto1[9A1-NE]-GFP* cells are completely defective in cytoplasmic microtubule (MT) nucleation.

**(C)** Unlike Mto1-GFP and Mto1[NE]-GFP, Mto1(1-500)-GFP is not observed in puncta. This is consistent with Fig. 3A, showing that Mto2 is required for the formation of Mto1-GFP puncta, together with our earlier finding that Mto1 amino acids 461-549 are required for interaction with Mto2 [S5].

**(D)** Upper panels: Images showing absence of free cytoplasmic Alp4-tdT puncta in *mto2 $\Delta$  mto1[bonsai]-GFP* cells (compare with Fig. 1G). Lower panels: Images of Alp4-tdT together with GFP-Atb2 in *mto2 $\Delta$  mto1[bonsai]-GFP* cells. In the absence of Mto1/2 multimers, the  $\gamma$ -TuC does not multimerize into free cytoplasmic puncta, although  $\gamma$ -TuC can still be seen at the SPB, presumably because of association with Pcp1 on the intranuclear face of the SPB (see Suppl. Fig. S1B). Occasionally, very faint Alp4-tdT puncta (white arrows) can be seen at ends of MT bundles, as a result of MT minus-end capping by nucleation-incompetent  $\gamma$ -TuC [S7]. As with “9A1” mutants, the few cytoplasmic MTs in these cells result from the escape of intranuclear mitotic spindle MTs into the cytoplasm ([S2]; see also Movie S4).

**(E)** Images of overexpressed *nmt81:Mto2-GFP* in *mto1[bonsai]* and *mto1 $\Delta$*  backgrounds, and overexpressed *nmt81:Mto1[bonsai]-GFP* in *mto2+* and *mto2 $\Delta$*  backgrounds. *nmt81:Mto2-GFP* forms puncta in the absence of Mto1, while *nmt81:Mto1[bonsai]-GFP* does not form puncta in the absence of Mto2.

**(F)** Images of *nmt81:Mto1[bonsai]-GFP* together with mCh-Atb2 in an *mto2 $\Delta$*  background. Even when over-expressed, *nmt81:Mto1[bonsai]-GFP* fails to promote MT nucleation in the absence of Mto2.

**(G)** Images of Mto1[bonsai]-GFP together with mCh-Atb2 in an *mto2-SZZ* background. This shows that SZZ tagging of Mto2 does not affect MT organization or assembly of Mto1/2[bonsai]-GFP puncta.

**(H)** Sedimentation profiles of carbonic anhydrase (CA), bovine serum albumin (BSA),  $\beta$ -amylase ( $\beta$ -A), and thyroglobulin (T) size standards on 10-30% isokinetic glycerol gradients, after 2.5-hour and 45-minute centrifugations, as determined by Coomassie-staining of gradient fractions.

**(I)** Model for assembly of active  $\gamma$ -TuC MT nucleation complexes via Mto1/2-dependent multimerization. In the model, Mto2 multimers provide a fundamental basis for Mto1/2 multimerization, which in turn promotes multimerization of  $\gamma$ -TuSCs. Additional cooperative interactions may “feed back” to regulate more detailed aspects of assembly. Bars, 5  $\mu$ m.

## Supplemental Experimental Procedures

### Yeast strain construction and cultures

All strains used in this study are listed below. Standard fission yeast genetic techniques were used throughout [S10]. Truncation, tagging, and deletion of genes were performed using PCR-based methods [S11]. PCR-based methods were used to generate a series of GFP-tagged *mto1* C-terminal truncation mutants: *mto1(1-800)-GFP*, *mto1(1-732)-GFP*, *mto1(1-683)-GFP*, *mto1(1-637)-GFP*, *mto1(1-575)-GFP*, *mto1(1-549)-GFP*, *mto1(1-500)-GFP*. Mutants ranging in size from *mto1(1-549)-GFP* to *mto1(1-800)-GFP* all exhibited the same phenotype, and further analysis was therefore limited to the smallest fragment *mto1(1-549)* (later referred to as *mto1[NE]*). A two-step gene replacement technique was used to generate Mto1 N-terminal truncations expressed from the endogenous *mto1* promoter. In the first step, nucleotides 1-390 of the *mto1* coding sequence were deleted and replaced with the *ura4+* gene, using PCR-based methods. In the second step, the *ura4+* gene was replaced with truncated versions of the *mto1* N-terminal coding sequence, produced by overlap-extension ("megaprimer") PCR. The resulting *mto1* N-terminal truncation mutants were selected for resistance to 5-fluoroorotic acid (5-FOA) and confirmed by DNA sequencing. This method was used to create a series of Mto1 N-terminal truncation mutants, where the N-terminus was truncated to amino acid 131, 203, or 242. While Mto1 function was retained following truncation to amino acid 131, further truncation to amino acid 203 or 242 was found to impair Mto1 function: cells had curved morphology, abnormal MT arrays, and rarely nucleated new MTs. As a result, further analysis of Mto1 N-terminal truncations was limited to mutants truncated up to amino acid 131.

*S. pombe* cells expressing N-terminal 6His-FLAG-GFP-tagged Mto2 under control of the *nmt81* promoter (*nmt81:HFG-Mto2*), were generated by Gateway-based cloning (Life Technologies) followed by homologous recombination at the *leu1* locus. PCR was used to generate the *mto2+* coding sequence flanked with attB1/2 sites, which was then integrated into the Gateway donor vector pDONR221 using BP Clonase. The *mto2+* coding sequence was then transferred from pDONR221 into the tagging vector pDUAL-HFG-81c [S12] using LR Clonase. The pDUAL-HFG-81c-*mto2* plasmid was digested with *NotI* restriction enzyme, liberating a *leu1*-targeting fragment containing the *nmt81:HFG-mto2* sequence. This fragment was then used to transform *leu1-32* (leucine-auxotroph) *S. pombe* cells. Upon recombination at the mutant *leu1-32* locus, the *leu1*-targeting fragment confers leucine prototrophy [S12], allowing for selection of Leu<sup>+</sup> integrants expressing *nmt81:HFG-Mto2*.

Cells were grown in YE5S rich medium, or in Nurse's modified EMM2 minimal medium [S10] using 5 g/l sodium glutamate instead of ammonium chloride as nitrogen source, and nutritional supplements at 175 mg/l; we refer to this as minimal medium. All cell-imaging experiments used minimal medium, with sodium glutamate and glucose added after autoclaving.



**List of strains used in this study:**

| <b>Strain</b> | <b>Genotype</b>                                                                                  | <b>Source</b> |
|---------------|--------------------------------------------------------------------------------------------------|---------------|
| KS819         | <i>h+ mto1-GFP:kanMX ade6-216 leu1-32 ura4-D18</i>                                               | Lab stock     |
| KS1017        | <i>h+ mto1Δ::kanMX6 ade6-216 leu1-32 ura4-D18</i>                                                | Lab stock     |
| KS1407        | <i>h- mto1-GFP:kanMX mto2Δ::kanMX6 ade6-216 leu1-32 ura4-D18</i>                                 | Lab stock     |
| KS1504        | <i>h- mto2-myc:kanMX ade6-210 leu1-32 ura4-D18</i>                                               | Lab stock     |
| KS1889        | <i>h+ mto2-GFP:kanMX6 ade6-216 leu1-32 ura4-D18</i>                                              | Lab stock     |
| KS2076        | <i>h+ mto1(9A1)-GFP:kanMX6 ade6-216 leu1-32 ura4-D18</i>                                         | Lab stock     |
| KS2738        | <i>h- mto1-GFP:kanMX6 kanMX6:nmt81::GFP-atb2 ade6-216 leu1-32 ura4-D18</i>                       | Lab stock     |
| KS2802        | <i>h+ hphMX6:nmt81::GFP-atb2 ade6-210 leu1-32 ura4-D18</i>                                       | Lab stock     |
| KS3887        | <i>h+ kanMX6:nmt81::mto1-GFP:hphMX ade6-216 leu1-32 ura4-D18</i>                                 | Lab stock     |
| KS3915        | <i>h- nmt81::His6FLAG::GFP-mto2 mto2Δ::kanMX6 ade6-216 leu1-32 ura4-D18</i>                      | This study    |
| KS3920        | <i>h- nmt81::His6FLAG::GFP-mto2 mto2-myc:kanMX6 ade6-210 leu1-32 ura4-D18</i>                    | This study    |
| KS515         | <i>h+ ade6-210 leu1-32 ura4-D18</i>                                                              | Lab stock     |
| KS516         | <i>h- ade6-216 leu1-32 ura4-D18</i>                                                              | Lab stock     |
| KS5207        | <i>h- mto1(1-500)-GFP:kanMX6 ade6-210 leu1-32 ura4-D18</i>                                       | This study    |
| KS5209        | <i>h- mto1(1-549)-GFP:kanMX6 ade6-210 leu1-32 ura4-D18</i>                                       | This study    |
| KS5349        | <i>h+ mto1(1-549)-GFP:kanMX6 mto2Δ::kanMX6 ade6-216 leu1-32 ura4-D18</i>                         | This study    |
| KS5381        | <i>h- natMX6:nmt81::mto1(131-1115)-GFP:kanMX leu1-32 ura4-D18</i>                                | This study    |
| KS5385        | <i>h- natMX6:nmt81::mto1(131-549)-GFP:kanMX ade6-210 leu1-32 ura4-D18</i>                        | This study    |
| KS5491        | <i>h- mto1(1-549)-GFP:kanMX6 hphMX6:nmt81::GFP-atb2 ade6-210 leu1-32 ura4-D18</i>                | This study    |
| KS5574        | <i>h? nmt81::His6FLAG::GFP-mto2 mto2-myc:kanMX mto1Δ::kanMX6 ade6-216 leu1-32 ura4-D18</i>       | This study    |
| KS5607        | <i>h+ mto1(1-549):kanMX6 ade6-216 leu1-32 ura4-D18</i>                                           | This study    |
| KS5645        | <i>h- mto1(1-549)-GFP:kanMX6 alp16Δ::natMX6 hphMX6:nmt81::GFP-atb2 ade6-210 leu1-32 ura4-D18</i> | This study    |
| KS5674        | <i>h- mto1-GFP:kanMX alp4-tdT::natMX6 ade6-216 leu1-32 ura4-D18</i>                              | This study    |
| KS5678        | <i>h+ mto1(1-549)-GFP:kanMX6 alp4-tdT::natMX6 ade6-210 leu1-32 ura4-D18</i>                      | This study    |
| KS5851        | <i>h- mto1(131-1115) ade6-210 leu1-32 ura4-D18</i>                                               | This study    |
| KS5922        | <i>h- mto1(131-549)-GFP:kanMX6 ade6-210 leu1-32 ura4-D18</i>                                     | This study    |
| KS5929        | <i>h+ mto1(131-549)-GFP:kanMX6 hphMX6:nmt81::GFP-atb2 ade6-210 leu1-32 ura4-D18</i>              | This study    |
| KS5933        | <i>h+ mto1(131-549)-GFP:kanMX6 alp4-tdT::natMX6 ade6-210 leu1-32 ura4-D18</i>                    | This study    |
| KS5940        | <i>h- mto1(131-1115)-GFP:kanMX6 ade6-210 leu1-32 ura4-D18</i>                                    | This study    |
| KS5944        | <i>h- mto1(131-1115) hphMX6:nmt81::GFP-atb2 ade6-210 leu1-32 ura4-D18</i>                        | This study    |
| KS6080        | <i>h+ mto1(131-9A1-549)-GFP:kanMX6 ade6-216 leu1-32 ura4-D18</i>                                 | This study    |
| KS6086        | <i>h- mto1(1-549):kanMX6 hphMX6:nmt81::GFP-atb2 ade6-216 leu1-32 ura4-D18</i>                    | This study    |
| KS6098        | <i>h- mto1(131-9A1-549)-GFP:kanMX6 mto2Δ::kanMX6 ade6-216 leu1-32 ura4-D18</i>                   | This study    |
| KS6102        | <i>h+ mto1(131-1115)-GFP:kanMX6 hphMX6:nmt81::GFP-atb2 ade6-210 leu1-32 ura4-D18</i>             | This study    |
| KS6315        | <i>h+ mto1(131-549)-GFP:kanMX6 alp16Δ::natMX6</i>                                                | This study    |

|        |                                                                                                                  |            |
|--------|------------------------------------------------------------------------------------------------------------------|------------|
|        | <i>hphMX6:nmt81::GFP-atb2 ade6-210 leu1-32 ura4-D18</i>                                                          |            |
| KS6456 | <i>h- mto1(131-549)-GFP:kanMX6 mto2Δ::kanMX6 ade6 leu1-32 ura4-D18</i>                                           | This study |
| KS6457 | <i>h+ mto1(131-549)-GFP:kanMX6 mto2Δ::kanMX6 hphMX6:nmt81::GFP-atb2 ade6 leu1-32 ura4-D18</i>                    | This study |
| KS6458 | <i>h+ mto2Δ::kanMX6 hphMX6:nmt81::GFP-atb2 ade6 leu1-32 ura4-D18</i>                                             | This study |
| KS6461 | <i>h+ mto1(1-549)-GFP:kanMX6 mto2Δ::kanMX6 hphMX6:nmt81::GFP-atb2 ade6 leu1-32 ura4-D18</i>                      | This study |
| KS6626 | <i>h- mto1(131-549):kanMX6 ade6-210 leu1-32 ura4-D18</i>                                                         | This study |
| KS6637 | <i>h? mto1(131-549):kanMX6 hphMX6:nmt81::GFP-atb2 ade6-210 leu1-32 ura4-D18</i>                                  | This study |
| KS6672 | <i>h- kanMX6:nmt81::mto1-GFP:hphMX6 natMX6::Z:ADH15:mCherry-Atb2 ade6 leu1-32 ura4-D18</i>                       | This study |
| KS6673 | <i>h+ mto1-GFP::kanMX6 natMX6::Z:ADH15:mCherry-Atb2 ade6 leu1-32 ura4-D18</i>                                    | This study |
| KS6675 | <i>h+ mto1(1-9A1-549)-GFP:kanMX6 Z:ADH15:mCherry-Atb2:natMX6 ade6 leu1-32 ura4-D18</i>                           | This study |
| KS6676 | <i>h+ mto1(131-9A1-549)-GFP:kanMX6 natMX6::Z:ADH15:mCherry-Atb2 ade6 leu1-32 ura4-D18</i>                        | This study |
| KS6677 | <i>h+ mto1(1-549)-GFP:kanMX6 Z:ADH15:mCherry-Atb2:natMX6 ade6-M210 leu1-32 ura4-D18</i>                          | This study |
| KS6678 | <i>h+ mto1(131-549)-GFP:kanMX6 natMX6::Z:ADH15:mCherry-Atb2 ade6-210 leu1-32 ura4-D18</i>                        | This study |
| KS6680 | <i>h+ natMX6:nmt81::mto1(131-549)-GFP:kanMX6 natMX6::Z:ADH15:mCherry-Atb2 ade6 leu1-32 ura4-D18</i>              | This study |
| KS6682 | <i>h- rlc1-GFP:kanMX6 ade6-210 leu1-32 ura4-D18</i>                                                              | This study |
| KS6715 | <i>h- natMX6::Z:ADH15:mCherry-Atb2 ade6 leu1-32 ura4-D18</i>                                                     | Lab stock  |
| KS6776 | <i>h+ alp4-GFP:hphMX6 mto1(131-549):kanMX6 natMX6::Z:ADH15:mCherry-Atb2 ade6-210 leu1-32 ura4-D18</i>            | This study |
| KS6791 | <i>h- mto2-GFP:kanMX6 mto1(131-549):kanMX6 natMX6::Z:ADH15:mCherry-Atb2 ade6-210 leu1-32 ura4-D18</i>            | This study |
| KS6816 | <i>h- mto1-GFP:kanMX6 alp16Δ::natMX6 kanMX6:nmt81::GFP-atb2 ade6-216 leu1-32 ura4-D18</i>                        | This study |
| KS6898 | <i>h+ alp6-GFP:kanMX6 mto1(131-549):kanMX6 natMX6::Z:ADH15:mCherry-Atb2 ade6-210 leu1-32 ura4-D18</i>            | This study |
| KS7055 | <i>h+ mto2-GFP:kanMX6 natMX6::Z:ADH15:mCherry-Atb2 ade6-216 leu1-32 ura4-D18</i>                                 | This study |
| KS7056 | <i>h- mto2-GFP:kanMX6 mto1Δ::kanMX6 natMX6::Z:ADH15:mCherry-Atb2 ade6-216 leu1-32 ura4-D18</i>                   | This study |
| KS7081 | <i>h- mto2-GFP:natMX6 ade6-210 leu1-32 ura4-D18</i>                                                              | This study |
| KS7131 | <i>h+ natMX6:nmt81::mto2-GFP:kanMX6 mto1Δ:kanMX6 ade6-210 leu1-32 ura4-D18</i>                                   |            |
| KS7134 | <i>h+ mto2-GFP:kanMX6 mto1(1-549):kanMX6 ade6-216 leu1-32 ura4-D18</i>                                           | This study |
| KS7160 | <i>h+ mto1(131-549)-GFP:kanMX6 alp4-tdT:natMX6 alp16Δ::natMX6 ade6-M210 leu1-32 ura4-D18</i>                     | This study |
| KS7177 | <i>h+ mto2-SZZ:kanMX6 mto1(131-549)-GFP:kanMX6 Z:ADH15:mCherry-Atb2:natMX6 ade6-M210 leu1-32 ura4-D18</i>        | This study |
| KS7230 | <i>h- mto1(9A1)-GFP:kanMX6 natMX6::Z:ADH15:mCherry-Atb2 ade6-216 leu1-32 ura4-D18</i>                            | This study |
| KS7319 | <i>h- mto1(131-549)-GFP:kanMX6 mto2Δ:kanMX6 hphMX6:nmt81::GFP-atb2 alp4-tdT:natMX6 ade6-210 leu1-32 ura4-D18</i> | This study |
| KS7321 | <i>h- mto1(131-549)-GFP:kanMX6 mto2Δ:kanMX6 alp4-tdT:natMX6 ade6-210 leu1-32 ura4-D18</i>                        | This study |
| KS7367 | <i>h+ mto2-SZZ:kanMX6 mto1Δ::kanMX6 natMX6::Z:ADH15:mCherry-Atb2 ade6-M210 leu1-32 ura4-D18</i>                  | This study |
| KS7384 | <i>h+ mto2-SZZ:kanMX6 mto1(131-9A1-549)-GFP:kanMX6 Z:ADH15:mCherry-Atb2:natMX6 ade6-M210 leu1-32 ura4-D18</i>    | This study |

|        |                                                                                       |            |
|--------|---------------------------------------------------------------------------------------|------------|
| KS7399 | <i>h+ natMX6:nmt81:mto1(131-549)-GFP:kanMX mto2Δ::kanMX6 ade6-210 ura4-D18</i>        | This study |
| KS7400 | <i>h- natMX6:nmt81:mto2-GFP:kanMX6 mto1(131-549):kanMX6 ade6M216 leu1-32 ura4-D18</i> | This study |

### **Physiological experiments**

To analyze cell morphology of *mto1* C-terminal truncation mutants, cells were grown to stationary phase to disrupt cell polarity, and then allowed to regrow on fresh medium to reveal any polarity phenotypes [S1, S2]. Cells were grown for 2 days on YE5S plates at 32°C, and then replica-plated to fresh YE5S and allowed to grow for 3 hours at 32°C. Cells were then washed from plates using phosphate buffered saline, fixed in 3.7% formalin saline solution for 30 minutes, and imaged by DIC microscopy using a 20X objective.

For microtubule regrowth experiments, cells were grown in YE5S at 30°C to a density of  $1 \times 10^7$  cells/ml. Microtubules were depolymerized by chilling culture flasks in an ice-water slurry (with occasional mixing) for 30 minutes. Microtubule regrowth was allowed to occur by returning flasks to a water bath at 25°C. Cells were harvested by rapid filtration on 47 mm Durapore membranes (Merck/Millipore) and fixed in -80°C methanol prior to cold-treatment, just before return to warming, and at different times after return to warming. Methanol-fixed cells were processed for immunofluorescence and stained with monoclonal anti-tubulin antibody TAT1 [S13] followed by Alexa568 donkey anti-mouse antibody (Life Technologies). Stained cells were washed and mounted on coverslips [S14] and imaged by spinning-disk fluorescence microscopy (see below).

For imaging Mto1-GFP and Mto1[NΔ130]-GFP localization in the presence of methyl benzimidazol-2-yl-carbamate (MBC; also known as Carbendazim), cells were grown in minimal medium. Cells were treated with 25 μg/mL MBC in 1% DMSO prior to imaging by spinning disk confocal microscopy (see below). Minimal medium-agarose pads for imaging (see below) also contained 25 μg/mL MBC and 1% DMSO. Negative control cells were treated with 1% DMSO.

### **Microscopy and image analysis**

Wide-field microscopy was performed using a Nikon TE300 inverted microscope with a Nikon 100x/1.40 NA Plan Apo or Nikon 20X/0.75 NA Plan Apo objective, attached to a Photometrics Coolsnap HQ CCD camera and controlled by Metamorph software (Molecular Devices) [S2]. Spinning-disk confocal microscopy was performed using a Nikon TE2000 inverted microscope with a Nikon 100x/1.45 NA Plan Apo objective, attached to a modified Yokogawa CSU-10 unit (Visittech) and an Andor iXon+ Du888 EMCCD camera, controlled by Metamorph software (Molecular Devices) [S15]. For simultaneous imaging of GFP-tagged Mto1/2 or GFP-tagged  $\gamma$ -TuC proteins with mCherry-tubulin, and also for colocalization imaging of Mto1-GFP and Alp4-tdTomato, an Optosplit III image splitter (Cairn Research Ltd.) with a T560LPXR dichroic filter (Chroma Technology) was used.

Prior to live-cell microscopy, cells were grown in minimal medium at 25°C for two days, with appropriate dilution to maintain exponential growth. Imaging was performed at room temperature (23-25°C). Cells were mounted on thin (50 μm) pads containing minimal medium and 2% agarose, between a coverslip and the microscope slide [S16].

Image processing was performed using Metamorph and ImageJ (NIH) software. Images were adjusted using linear contrast enhancement and are presented as maximum projections containing the full cell volume unless otherwise indicated. Within the same figure panel or movie, all still and time-lapse images were acquired and processed identically and thus can be compared directly, with the exception of overexpressed proteins in Suppl. Fig. S2C (see Suppl. Fig. S2C legend). Movies were generated using Quicktime (Apple) and Fireworks (Adobe).

**Conditons for fluorescence microscopy:**

| Image type                                                            | Figures/<br>Movies                | Laser power (%)*,<br>exposure time (ms) |          | Z series    | Timelapse   |
|-----------------------------------------------------------------------|-----------------------------------|-----------------------------------------|----------|-------------|-------------|
|                                                                       |                                   | 488 nm                                  | 561 nm   |             |             |
| Mto1-GFP, Alp4-tdT**                                                  | 1G, S1B,<br>S3D                   | 50,<br>2000                             | 40, 2000 | 8 x 0.6 um  | -           |
| GFP-Atb2                                                              | 1E, S1E,<br>Movie S1,<br>Movie S4 | 20, 100                                 | -        | 9 x 0.5 um  | 100 x 5 s   |
| <i>nmt81</i> :Mto1-GFP +/-<br>MBC                                     | 1C                                | 70,<br>1000                             | -        | 9 x 0.6 um  | -           |
| Microtubule regrowth                                                  | 1D, S2B                           | 25, 500                                 | -        | 11 x 0.4 um | -           |
| Nucleating puncta,<br>mCh-Atb2**                                      | 2A, 2B,<br>Movie S2               | 70, 200                                 | 70, 200  | 8 x 0.6 um  | 80 x 1.63 s |
| Mto1-GFP                                                              | 3A, S3C                           | 70, 500                                 | -        | 8 x 0.6 um  | -           |
| Mto2-GFP, mCh-Atb2**                                                  | 3B, Movie S5                      | 70, 200                                 | 70, 200  | 8 x 0.6 um  | 40 x 1.63 s |
| Mto2-GFP                                                              | S1C                               | 70, 500                                 | -        | 9 x 0.6 um  | -           |
| Mto1-GFP +/- MBC                                                      | S2A                               | 70, 800                                 | -        | 8 x 0.6 um  | -           |
| Mto1-GFP (endogenous<br>and over-expressed),<br>mCh-Atb2              | S2C, S3B                          | 70, 500                                 | 40, 500  | 9 x 0.6 um  | -           |
| Mto1-GFP, mCh-Atb2**                                                  | S2D                               | 70, 500                                 | 70, 500  | 9 x 0.6 um  | -           |
| Mto1[9A1-bonsai]-GFP                                                  | Movie S3                          | 70, 500                                 | -        | 9 x 0.6 um  | 20 x 4.5 s  |
| <i>nmt81</i> :Mto1[bonsai]-<br>GFP and <i>nmt81</i> :Mto2-<br>GFP     | S3E                               | 70, 200                                 |          | 9 x 0.6 um  | -           |
| <i>nmt81</i> :Mto1[bonsai]-<br>GFP with mCh-Atb2                      | S3F                               | 70, 500                                 | 40, 500  | 9 x 0.6 um  | 40 x 5 s    |
| Alp4-tdT, GFP-Atb2 (in<br><i>mto1[bonsai]-GFP</i><br><i>mto2Δ</i> )** | S3D                               | 15,<br>2000                             | 40, 2000 | 8 x 0.6 um  | -           |
| Mto1[bonsai]-GFP,<br>mCh-Atb2 in <i>mto2-SZZ</i>                      | S3G                               | 70, 500                                 | 40, 300  | 8 x 0.6 um  | -           |

\* "100%" power = 20 mW for 488 nm, 15 mW for 561 nm.

\*\* Imaged with Optosplit III image splitter (simultaneous illumination by 488 nm and 561 nm lasers).

For quantification of microtubule nucleation frequency in various *mto1* strains, live-cell movies of GFP-tubulin (*nmt81*:GFP-Atb2) were used, and *de novo* nucleation events were classified as occurring either in the region on/near the nuclear envelope or elsewhere "free" in the cytoplasm (see Fig. 1F and Suppl. Fig. S1G). *De novo* nucleation events were defined as the appearance of a new, distinct MT that arose neither by breakage of a pre-existing MT nor by release from a pre-existing MT bundle. MT nucleation on pre-existing MTs was explicitly excluded from analysis, because of the difficulties in confidently identifying all such events (which are typically immediately followed by bundling of the new MT with the pre-existing MT on which it was nucleated) and in distinguishing such nucleation events from the sliding of pre-existing MT fragments along other pre-existing MTs. Therefore, for those strains in which the MT-binding region of Mto1 is intact (e.g. wild-type and *mto1[NΔ130]*), the true total frequency of MT nucleation is significantly greater than the total nucleation frequency shown in graphs. This should be borne in mind when comparing frequency of "free" vs. "nuclear envelope-associated" MT nucleation among the various strains.

For quantification of fluorescent Mto1[bonsai]-GFP, Mto2-GFP, Alp4-GFP, and Alp6-GFP puncta nucleating mCherry-Atb2-labelled microtubules, images were taken from time-lapse movies using the conditions described for Fig. 2A and Suppl.



Movie S2 (see above). For calibration with Rlc1-GFP, single-timepoint images of an *rlc1-GFP* strain were acquired using identical laser power and exposure time (12 Z-sections; 0.6  $\mu\text{m}$  spacing). All proteins were tagged with the same version of GFP (S65T) to allow for direct comparison of fluorescence intensity per GFP fusion protein. The intensities of nucleating GFP-puncta and Rlc1-GFP cytokinesis nodes were measured in sum projections of two successive Z-sections, using 5x5-pixel circular regions. The average intensity of adjacent cytoplasmic regions (4 regions for Rlc1-GFP and 3 regions for nucleating puncta) was subtracted as background. These cytoplasmic regions were also measured in sum projections of two successive Z-sections, using 5x5-pixel circular regions. The intensity of nucleating puncta was measured at the onset of microtubule nucleation (i.e., at the first timepoint in which nucleation could be detected). To avoid any effects from photobleaching, each preparation was used for one movie only, and the absence of photobleaching was further confirmed by plotting intensity of puncta against the timepoint in the movie at which each punctum was quantified (data not shown); we found no evidence for photobleaching in these experiments. Rlc1-GFP nodes were used as the standard in determining Mto1-bonsai-GFP, Mto2-GFP, Alp4-GFP, and Alp6-GFP copy numbers, using the previously determined average value of  $41.3 \pm 23$  molecules of Rlc1 per cytokinesis node [S17].

### **Immunoprecipitation experiments**

For immunoprecipitations shown in Fig. 3, fission yeast soluble extracts were prepared by freezing cell pellets in liquid nitrogen and then grinding to a powder while frozen. Cell powder was then thawed on ice and resuspended in lysis buffer (50 mM HEPES pH 7.6, 75 mM KCl, 1 mM MgCl<sub>2</sub>, 1mM EGTA, 0.1% [v/v] Triton X-100, 0.5 mM DTT, 1 mM PMSF, 1 mM benzamidine, 10  $\mu\text{g}/\text{ml}$  each of "CLAAPE" protease inhibitors (chymostatin, leupeptin, antipain, aprotinin, pepstatin, E64). Lysates were clarified by centrifugation at 13,000 RPM for 15 minutes at 4°C in a microcentrifuge, and total protein concentration was determined by Bradford assay. Uniform amounts of total protein ( $\sim 30$  mg) were added to  $\sim 3 \times 10^7$  Protein G Dynabeads previously bound to 1.2  $\mu\text{g}$  of homemade sheep anti-GFP antibody. Beads were incubated with lysate for 1 hour at 4°C, and then washed six times 1 ml lysis buffer. Protein was eluted from Dynabeads by incubation in Laemmli sample buffer (50°C, 10 min). Western blots of cell extracts ("input") and immunoprecipitates were probed with sheep anti-Mto1 antiserum, sheep anti-GFP antibody, and 9E10 mouse monoclonal anti-Myc antibody, and imaged by enhanced chemiluminescence.

For immunoprecipitations shown in Suppl. Fig. S2, conditions were similar, except lysis buffer was 20 mM NaHEPES pH 7.5, 50 mM K-acetate, 200 mM NaCl, 1 mM EDTA, 0.2% TritonX-100, and a protease inhibitor cocktail: 5  $\mu\text{g}/\text{ml}$  CLAAPE, 2 mM AEBSF, 1 mM benzamidine, 1mM PMSF. In addition, Protein G Dynabeads were covalently coupled to homemade sheep anti-GFP antibody using dimethyl pimelimidate. Western blots of cell extracts and immunoprecipitates were probed with sheep anti-Mto1 antiserum, sheep anti-Mto2 antiserum, and GTU-88 monoclonal anti- $\gamma$ -tubulin antibody (Sigma). Anti-Mto1 and anti-Mto2 blots were further incubated with unlabelled GT-34 mouse monoclonal anti-goat antibody to amplify the signal, and all blots were probed with IRDye800CW donkey anti-mouse antibody. Blots were imaged using an Odyssey fluorescence imager (Licor) and quantified using Image Studio (Licor).

Immunoprecipitations shown in Suppl. Fig. S3 were performed in the same manner as those in Suppl. Fig. S2, except lysis buffer contained 25 mM sodium phosphate pH 7.5, 100 mM KCl, 0.5 mM EDTA, 0.2% Triton X-100, protease inhibitor cocktail (10  $\mu\text{g}/\text{mL}$  CLAAPE, 2 mM AEBSF, 2 mM benzamidine, 2 mM PMSF), and phosphatase inhibitors (50 mM Na  $\beta$ -glycerophosphate, 1mM NaF, 0.1 mM Na<sub>3</sub>VO<sub>4</sub>,

50 nM calyculin A, 50 nM okadaic acid). Cell extracts and immunoprecipitates were analyzed by SDS-PAGE and Coomassie staining.

### **Quantification of cellular levels of Mto1 and Mto2**

To determine absolute concentrations of Mto1 and Mto2 in yeast (i.e. numbers of molecules per cell; Suppl. Fig. S1D), known amounts of recombinant MBP-Mto2 and Mto1-6xHis were used to calibrate Western blots of fission yeast extracts.

The construct for the expression of recombinant Mto1-6xHis was produced by Gateway cloning. PCR was used to amplify the *mto1+* coding sequence with flanking attB1/2 sites. This was integrated into the Gateway donor vector pDONR201 using BP clonase, and then transferred into the tagging/expression vector p0GWA [S18] (using LR Clonase) for expression of Mto1-6xHis fusion protein. Mto1-6xHis was expressed in BL21-RIL *E. coli*, induced with 1 mM IPTG for 4 hours at 18°C. Cells were lysed by sonication, and fusion protein concentration was determined by SDS-PAGE and Coomassie staining, using bovine serum albumin as a calibration standard.

To produce the construct for expression of MBP-Mto2, PCR was used to amplify the *mto2+* coding sequence with an N-terminal TEV protease site (not used) and flanking attB1/2 sites. This was integrated into the Gateway donor vector pDONR221 using BP Clonase, and then transferred into the tagging/expression vector pHMGWA [S18], using LR Clonase, for expression of MBP-Mto2 fusion protein. Recombinant MBP-Mto2 was expressed in BL21-CodonPlus-RIL *E. coli* (Stratagene, USA). Protein expression was induced by addition of 0.05 mM IPTG to cultures, which were then grown overnight at 18°C, harvested by centrifugation, and frozen in liquid nitrogen. For purification of MBP-Mto2, 4X pellet volumes of lysis buffer (50 mM Tris-HCl pH 8.0, 150 mM NaCl, 0.2% [v/v] Triton X-100, 1 mM EDTA, 1 mM DTT, 1 mM PMSF, 1 mM benzamidine, 10 µg/ml CLAAPE) were added to frozen cells at 4°C. Cells were resuspended by repeated passage through a Dounce homogenizer (30X loose pestle, 30X tight pestle). Benzonase (2.5 U/ml) and MgCl<sub>2</sub> (6mM) were added, and cells were passed 4 times through a French Press pressure cell (ThermoSpectronic, USA) at 15,000 psi. Lysates were clarified by centrifugation at 20,000 RPM in a Beckman JA-20 rotor (20 min, 4°C), followed by a second centrifugation at 40,000 RPM in a Beckman Type 45Ti rotor (1 hour, 4°C). Cleared lysate was incubated with amylose resin (New England Biolabs; 2 ml resin per 20 ml lysate) overnight at 4°C, and resin was then washed with 100 ml of wash buffer (50 mM Tris-HCl pH 8.0, 150 mM NaCl, 0.2% [v/v] Triton X-100, 1 mM EDTA, 1 mM DTT). MBP-Mto2 was then eluted from amylose resin using 10 mM maltose. The concentration of MBP-Mto2 fusion protein was then determined as for Mto1-6xHis (but with correction for the MBP moiety).

To determine the cellular levels of Mto1 and Mto2, total cell extracts were prepared from exponentially growing fission yeast cultures. Pelleted fission yeast cells were resuspended in Tris-buffered saline with 1 mM EDTA and 1 mM PMSF, boiled for 5 minutes to inactivate proteases, and disrupted by bead-beating with 0.5 mm Zirconium beads in a Ribolyser (Hybaid; 2 cycles, 20 s each, speed "6.5"). Disrupted cells were boiled in Laemmli sample buffer (without reducing agents or bromophenol blue), and then centrifuged at 13,000 RPM for 15 minutes at room temperature to pellet insoluble debris. Supernatants were recovered and protein concentration determined by bicinchoninic acid assay (Pierce). Cell extracts corresponding to known amounts of cells were analyzed by quantitative anti-Mto1 or anti-Mto2 western blotting, using an Odyssey fluorescence imager and Image Studio software (Licor). On the same blots, we also analyzed wild-type or *mto1Δ* cell lysates "spiked" with known amounts of recombinant MBP-Mto2 or Mto1-6His, respectively. Lysates spiked with recombinant protein were used to generate a

Western-blot calibration curve, from which the endogenous Mto1 and Mto2 protein levels were calculated.

To determine relative expression levels of Mto1 truncation-mutant proteins compared to full-length Mto1 (Suppl. Fig. S1F), pelleted fission yeast cells were resuspended in Tris-buffered saline, boiled for 5 minutes to inactivate proteases, and disrupted by bead-beating with 0.5 mm Zirconium beads in a Ribolyser (Hybaid), as above. Disrupted cells were boiled in Laemmli sample buffer (without reducing agents or bromophenol blue), and protein concentration of cell extracts was determined by bicinchoninic acid assay (Pierce). Equal amounts of extracts were then analyzed by conventional SDS-PAGE and Western blotting. Western blots were probed with sheep anti-Mto1 antiserum, followed by unlabelled GT-34 mouse monoclonal anti-goat antibody and IRDye800CW donkey anti-mouse antibody. Blots were imaged using an Odyssey fluorescence imager (Licor) and quantified using Image Studio (Licor).

### ***Glycerol gradient analysis of endogenous Mto1/2 and Mto2***

Glycerol density-gradient centrifugation of endogenous Mto1/2 and Mto2 (the latter from *mto1* $\Delta$  cells) was performed both on cell lysates and on affinity purifications of Mto2 containing a C-terminal SZZ tag. The SZZ tag includes the S-peptide sequence of RNase A, a TEV cleavage site, and two copies of a minimal synthetic Protein A-derived IgG-binding domain and was generated using the plasmid pKW804 [S19]. Cell pellets were frozen in liquid nitrogen, ground to a powder while frozen, and 40 g of cell powder was resuspended in 80 mL of XB1 lysis buffer (10 mM NaPO<sub>4</sub> pH 7.5, 100 mM NaCl, 0.5 mM MgCl<sub>2</sub>, 1.5 mM EGTA, 1% [v/v] Triton X-100, 5% [v/v] glycerol, 1 mM PMSF, 1 mM AEBSF, 10  $\mu$ g/ml each of "CLAAPE" protease inhibitors [chymostatin, leupeptin, antipain, aprotinin, pepstatin, E64]). Lysates were clarified by centrifugation at 4000 RPM in a Thermo Scientific Heraeus Megafuge (15 min, 4°C), followed by a second centrifugation at 24,000 RPM in a Beckman JA25.5 rotor (45 min, 4°C). Samples of clarified lysates were analyzed by glycerol density-gradient centrifugation (see below), and the remainder used for Mto2-SZZ purification. For Mto2-SZZ purification, clarified lysates were added to 1.5 mL of IgG-coupled Fractogel beads [S20], which had been previously washed in XB1 buffer. Lysates and beads were allowed to incubate for 2 hours at 4°C. Beads were then washed sequentially with 100 mL of XB1, XB2 (10 mM NaPO<sub>4</sub> pH 7.5, 100 mM NaCl, 0.5 mM MgCl<sub>2</sub>, 1.5 mM EGTA, 0.2% [v/v] Triton X-100, 10% [v/v] glycerol), and XB3 (10 mM NaPO<sub>4</sub> pH 7.5, 100 mM NaCl, 0.5 mM MgCl<sub>2</sub>, 1.5 mM EGTA, 0.1% CHAPS, 10% [v/v] glycerol) buffers. Mto2-S was then released from IgG Fractogel beads by cleavage with 500 units of TEV protease in XB3 buffer (total volume 2.2 mL) for 2 hours at 4°C. Glycerol concentration was reduced to 6% by dilution in XB3 lacking glycerol, and a sample of the TEV-eluted material was concentrated 10-fold by centrifugation in a 30 kDa cut-off centrifugal filter unit (Amicon, Merck/Millipore). Partially purified protein was stored overnight at 4°C prior to glycerol density-gradient centrifugation.

Glycerol gradients (2 mL, 10-30% glycerol [w/v]) were prepared in XB3 buffer using a Gradient Master 107ip (BioComp Instruments). Gradients were loaded with 100  $\mu$ L of either: clarified lysate; Mto2-S partially purified material; or Mto2-S partially purified and 10-fold concentrated material. Gradients were then centrifuged in a Beckman TLS-55 swinging bucket rotor (55,000 RPM, 4°C) for 2.5 hours or 45 minutes. Size markers were analyzed in parallel on separate gradients. Fractions (100  $\mu$ L) were collected and analyzed by quantitative anti-Mto1 and anti-Mto2 western blotting (for yeast proteins; see below), or by Coomassie Blue staining (for size markers).

In these experiments, neither the partially purified Mto2-S generated by TEV elution from IgG Fractogel nor associated Mto1[9A1-bonsai]-GFP was observed as a prominent band by SDS-PAGE and Coomassie Blue staining, relative to non-specific

proteins. This is likely due to the very low initial abundance of the proteins, combined with inefficient binding and loss of protein during washes. While the reasons for inefficient purification are not entirely clear, this was not unique to Mto2-SZZ, as we observed considerably worse binding when Mto2 was tagged with other TEV-cleavable tags (not shown). To assess relative concentration and fold-enrichment of Mto1, Mto2, and  $\gamma$ -tubulin following Mto2-S partial purification, we used quantitative Western blotting and quantitative Coomassie Blue staining of partially-purified material versus cell lysates. Mto1 and Mto2 western blots were probed with sheep anti-Mto1 or anti-Mto2 antiserum, followed by unlabelled GT-34 mouse monoclonal anti-goat antibody and IRDye800CW donkey anti-mouse antibody.  $\gamma$ -Tubulin western blots were probed with GTU-88 monoclonal anti- $\gamma$ -tubulin antibody (Sigma), followed by IRDye800CW donkey anti-mouse antibody. Blots and Coomassie stained gels were imaged using an Odyssey fluorescence imager (Licor) and quantified using Image Studio (Licor). Relative concentration and fold-enrichment were determined as shown for Mto2, and similarly for Mto1[9A1-bonsai]-GFP, with results shown below:

$$\text{Mto2 relative concentration} = \frac{\text{Mto2 - S Western blot signal}_{\text{TEV eluate}}}{\text{Mto2 - SZZ Western blot signal}_{\text{cell lysate}}}$$

$$\text{Mto2 fold - enrichment} = \frac{\left( \frac{\text{Mto2 - S Western blot signal}_{\text{TEV eluate}}}{\text{Total Coomassie Blue signal}_{\text{TEV eluate}}} \right)}{\left( \frac{\text{Mto2 - SZZ Western blot signal}_{\text{cell lysate}}}{\text{Total Coomassie Blue signal}_{\text{cell lysate}}} \right)}$$

|                                                                                 | Cell lysate<br>(counts / $\mu$ l) | TEV eluate<br>(counts / $\mu$ l) | Relative concentration in<br>TEV eluate compared to<br>cell lysate | Fold-enrichment as<br>a proportion of total<br>protein |
|---------------------------------------------------------------------------------|-----------------------------------|----------------------------------|--------------------------------------------------------------------|--------------------------------------------------------|
| <b>Partial purification from<br/><i>mto2-SZZ mto1[9A1-<br/>bonsai]-GFP</i>:</b> |                                   |                                  |                                                                    |                                                        |
| Total protein                                                                   | 47.3                              | 0.123                            | 0.00260 X                                                          | (n/a)                                                  |
| Mto2 (-SZZ or -S)                                                               | 3.49                              | 30.84                            | 8.84 X                                                             | 3398 X                                                 |
| Mto1[9A1-bonsai]-GFP                                                            | 6.46                              | 3.11                             | 0.48 X                                                             | 185 X                                                  |
| <b>Partial purification from<br/><i>mto2-SZZ mto1<math>\Delta</math></i>:</b>   |                                   |                                  |                                                                    |                                                        |
| Total protein                                                                   | 48.2                              | 0.129                            | 0.00268 X                                                          | (n/a)                                                  |
| Mto2 (-SZZ or -S)                                                               | 4.89                              | 18.53                            | 3.79 X                                                             | 1417 X                                                 |

Note: Counts are arbitrary units derived from measurements using the Licor Odyssey. They can be compared within rows but not between rows

In these experiments,  $\gamma$ -tubulin in the TEV eluate was barely detectable, and approximate quantification of  $\gamma$ -tubulin signal was consistent with no enrichment whatsoever. We note that when purified from the *mto1 $\Delta$*  background, Mto2-S in the TEV eluate was significantly less enriched as a proportion of total protein as compared to when purified from the *mto1[9A1-bonsai]-GFP* background. This may reflect the influence of Mto1 on the multimerization state of Mto2.

## Supplemental References

- S1. Browning, H., Hayles, J., Mata, J., Aveline, L., Nurse, P., and McIntosh, J.R. (2000). Tea2p is a kinesin-like protein required to generate polarized growth in fission yeast. *J Cell Biol* 151, 15-28.



- S2. Sawin, K.E., Lourenco, P.C., and Snaith, H.A. (2004). Microtubule nucleation at non-spindle pole body microtubule-organizing centers requires fission yeast centrosomin-related protein mod20p. *Curr Biol* *14*, 763-775.
- S3. Flory, M.R., Morphew, M., Joseph, J.D., Means, A.R., and Davis, T.N. (2002). Pcp1p, an Spc110p-related calmodulin target at the centrosome of the fission yeast *Schizosaccharomyces pombe*. *Cell Growth Differ* *13*, 47-58.
- S4. Fong, C.S., Sato, M., and Toda, T. (2010). Fission yeast Pcp1 links polo kinase-mediated mitotic entry to gamma-tubulin-dependent spindle formation. *EMBO J* *29*, 120-130.
- S5. Samejima, I., Lourenco, P.C., Snaith, H.A., and Sawin, K.E. (2005). Fission yeast mto2p regulates microtubule nucleation by the centrosomin-related protein mto1p. *Mol Biol Cell* *16*, 3040-3051.
- S6. Samejima, I., Miller, V.J., Groocock, L.M., and Sawin, K.E. (2008). Two distinct regions of Mto1 are required for normal microtubule nucleation and efficient association with the gamma-tubulin complex in vivo. *J Cell Sci* *121*, 3971-3980.
- S7. Anders, A., and Sawin, K.E. (2011). Microtubule stabilization in vivo by nucleation-incompetent gamma-tubulin complex. *J Cell Sci* *124*, 1207-1213.
- S8. Anders, A., Lourenco, P.C., and Sawin, K.E. (2006). Noncore components of the fission yeast gamma-tubulin complex. *Mol Biol Cell* *17*, 5075-5093.
- S9. Zimmerman, S., and Chang, F. (2005). Effects of {gamma}-tubulin complex proteins on microtubule nucleation and catastrophe in fission yeast. *Mol Biol Cell* *16*, 2719-2733.
- S10. Moreno, S., Klar, A., and Nurse, P. (1991). Molecular analysis of the fission yeast *Schizosaccharomyces pombe*. *Meth Enzymol* *194*, 795-823.
- S11. Bahler, J., Wu, J.Q., Longtine, M.S., Shah, N.G., McKenzie, A., 3rd, Steever, A.B., Wach, A., Philippsen, P., and Pringle, J.R. (1998). Heterologous modules for efficient and versatile PCR-based gene targeting in *Schizosaccharomyces pombe*. *Yeast* *14*, 943-951.
- S12. Matsuyama, A., Shirai, A., Yashiroda, Y., Kamata, A., Horinouchi, S., and Yoshida, M. (2004). pDUAL, a multipurpose, multicopy vector capable of chromosomal integration in fission yeast. *Yeast* *21*, 1289-1305.
- S13. Woods, A., Sherwin, T., Sasse, R., MacRae, T.H., Baines, A.J., and Gull, K. (1989). Definition of individual components within the cytoskeleton of *Trypanosoma brucei* by a library of monoclonal antibodies. *J Cell Sci* *93*, 491-500.
- S14. Sawin, K.E., and Nurse, P. (1998). Regulation of cell polarity by microtubules in fission yeast. *J Cell Biol* *142*, 457-471.
- S15. Snaith, H.A., Anders, A., Samejima, I., and Sawin, K.E. (2010). New and old reagents for fluorescent protein tagging of microtubules in fission yeast; experimental and critical evaluation. *Meth Cell Biol* *97*, 147-172.
- S16. Sawin, K.E. (1999). GFP fusion proteins as probes for cytology in fission yeast. *Meth Cell Biol* *58*, 123-138.
- S17. Laporte, D., Coffman, V.C., Lee, I.J., and Wu, J.Q. (2011). Assembly and architecture of precursor nodes during fission yeast cytokinesis. *J Cell Biol* *192*, 1005-1021.
- S18. Busso, D., Delagoutte-Busso, B., and Moras, D. (2005). Construction of a set Gateway-based destination vectors for high-throughput cloning and expression screening in *Escherichia coli*. *Anal Biochem* *343*, 313-321.
- S19. Brune, C., Munchel, S.E., Fischer, N., Podtelejnikov, A.V., and Weis, K. (2005). Yeast poly(A)-binding protein Pab1 shuttles between the nucleus and the cytoplasm and functions in mRNA export. *RNA* *11*, 517-531.
- S20. Sawin, K.E., Bicho, C.C., and Snaith, H.A. (2010). Inexpensive synthetic-based matrix for both conventional and rapid purification of protein A- and tandem affinity purification-tagged proteins. *Anal Biochem* *397*, 241-243.

## Movie Legends

### **Movie S1. *mto1[NE]-GFP* cells exhibit increased microtubule nucleation from the nuclear envelope, while *mto1[bonsai]-GFP* cells exhibit spatially random microtubule nucleation**

GFP-tubulin (GFP-Atb2) in *mto1-GFP*, *mto1[NE]-GFP*, and *mto1[bonsai]-GFP* cells, in both *alp16+* (wild-type) and *alp16Δ* backgrounds. In *alp16Δ* cells, none of the “ $\gamma$ -TuRC-specific” proteins Gfh1 (GCP4 homolog), Mod21 (GCP5) or Alp16 (GCP6) are associated with the  $\gamma$ -tubulin small complex ( $\gamma$ -TuSC) [S8]. Movies of *alp16+* cells correspond to the images shown in Fig. 1E and Suppl. Fig. S1E. GFP-tagged Mto1 is too faint to be seen here relative to GFP-tubulin. All sequences play twice, with asterisks indicating nucleation events during the first run. Z-series were acquired every 5 s. Maximum projections of 9 Z-sections are shown. Movie plays at 15 frames per second (fps).

### **Movie S2. Microtubules are nucleated directly from puncta containing Mto1[bonsai]-GFP, Mto2-GFP, Alp4-GFP, and Alp6-GFP**

mCherry-microtubule (mCh-Atb2) nucleation from Mto1[bonsai]-GFP puncta, and from Mto2-GFP, Alp4-GFP, and Alp6-GFP puncta in an (untagged) *mto1[bonsai]* background. Movies correspond to images shown in Fig. 2A. In the lower Mto1[bonsai]-GFP movie, an Mto1[bonsai]-GFP punctum nucleates an mCherry-microtubule that is subsequently incorporated into a microtubule bundle. Each sequence plays twice, with a box indicating the relevant punctum during the first run. Z-series were acquired every 1.63 s. Movies show single Z-sections or maximum projections of two adjacent Z-sections. Movie plays at 15 fps.

### **Movie S3. Formation of Mto1 puncta requires Mto2**

Mto1[9A1-bonsai]-GFP in *mto2+* (wild-type) and *mto2Δ* cells. Mto1[9A1-bonsai] does not interact with the  $\gamma$ -tubulin complex (Suppl. Fig. S2) and thus allows investigation of Mto1/2 complex organization independently of its association with the  $\gamma$ -tubulin complex. Related examples of other Mto1-variants are shown in Fig. 3A. Z-series were acquired every 4.5 s. Maximum projections of 9 Z-sections are shown. Movie plays at 15 fps.

### **Movie S4. *mto1[NE]-GFP* and *mto1[bonsai]-GFP* cells are completely defective in cytoplasmic microtubule nucleation in the absence of Mto2**

GFP-tubulin (GFP-Atb2) in *mto1+* (wild-type), *mto1[NE]-GFP*, and *mto1[bonsai]-GFP* cells, in both *mto2+* (wild-type) and *mto2Δ* backgrounds. GFP-tagged Mto1 is too faint to be seen here relative to GFP-tubulin. In *mto1+ mto2Δ* cells, cytoplasmic microtubules are nucleated from the spindle pole body only [S5], during both mitosis (astral microtubules from mitotic spindle, right-most cell in bottom-left panel) and interphase (arrow in bottom-left panel). By contrast, in *mto1[NE]-GFP mto2Δ* and *mto1[bonsai]-GFP mto2Δ* cells, cytoplasmic microtubules are never nucleated *de novo* (0 events in 50 cells imaged over 500 seconds; data not shown). Indeed, when cytoplasmic microtubules are present in these cells, they are derived from intranuclear mitotic spindle microtubules that escape into the cytoplasm at the end of mitosis [S2, S6, S9]. If these cytoplasmic microtubules depolymerize completely, they never return, leading to many cells without any cytoplasmic microtubules. Z-series were acquired every 5 s. Max projections of 9 Z-sections are shown. Movie plays at 15 fps.

### **Movie S5. Formation of Mto2 puncta does not require Mto1**

Mto2-GFP and mCherry-tubulin (mCh-Atb2) in *mto1[bonsai]* and *mto1Δ* cells. mCh-Atb2 is also shown in *mto1+ mto2+* cells (wild-type, without any GFP-tagged protein) as a negative control for GFP fluorescence. Movies correspond to images shown in Fig. 3B. When cytoplasmic microtubules are present in *mto1Δ* cells, they are always derived from intranuclear mitotic spindle microtubules that escape into the cytoplasm. Z-series were acquired every 1.63 s for 40 timepoints. Maximum projections of 8 Z-sections are shown. Movie plays at 15 fps.
